# Supplementary material for: A High Throughput Single Nucleotide Polymorphism Multiplex Assay for Parentage Assignment in New Zealand Sheep
Source: PLoS One. 2014 Apr 16;9(4):e93392. doi: 10.1371/journal.pone.0093392 (PMC3989167; doi:10.1371/journal.pone.0093392)
Supplement: Table S3 — The genotypes observed in the ISGC 73 sequenced animals (diverse breed panel) for the 98 parentage SNPs in Sequenom iPlex assay and neighboring SNPs identified in the 100 nucleotide 5′ and 3′ flanking regions. (XLSX) [file pone.0093392.s004.xlsx]

## Sheet: parentage_snp_flanks
Table S3: The genotypes observed in the ISGC 73 sequenced animals (diverse breed panel) for the 98 parentage SNPs in Sequenom iPlex assay and neighboring SNPs identified in the 100 nucleotide 5' and 3' flanking regions
							African White Dorper	African White Dorper	Afshari	Afshari	Awassi	Bangladeshi	Bangladeshi	Brazilian Creole	Brazilian Creole	Castellana	Castellana	Changthangi	Changthangi	Cheviot	Churra	Churra	Cine Capari	Dollgellau Welsh Mountain	Eastern Tibetan	Ethiopian Menz	Finnsheep	Finnsheep	Garole	Garut	Garut	Gulf Coast native	Gulf Coast native	Indian Garole	Karakas	Karakas	Karya	Meat Lacaune	Merino	Merino	Merino	Mmilk Lacaune	Morada Nova	Morada Nova	Namaqua Afrikaner	Norduz	Norduz	Northern Tibetan	Ojalada
SNP Marker Name	SNP Description	OAR V3.0 Chromosome	OAR V3.0 Location	Nucleotide Distance from Parentage SNP	Reference Allele	Alternate Allele	AWD3	AWD1	AFS33	AFS32	AW454	BGE2	BGE4	BCS1	BCS3	CAS1	CAS3	CHA02	CHA05	CHVC1	CHU2	CHU1	CC50	DWM1	ZD11	EMZ1	FIN1	FIN4	GAR14	GUR4	GUR5	GCN5	GCN4	GAR4	KRS3	KRS5	KR4	LAC1	MERC1	MER454	MERA1	LAC84	BMN4	BMN3	NQA11	NDZ4	NDZ1	ZB08	OJA4
oar3_OAR1_8059564	DU290101_Neighbouring SNP	OAR1	8059564	-97	G	C	.	.	.	.	.	.	.	.	.	.	.	.	.	.	.	.	.	.	.	.	.	.	.	.	.	.	.	.	.	.	.	.	.	.	.	.	.	.	.	.	.	.	.
oar3_OAR1_8059591	DU290101_Neighbouring SNP	OAR1	8059591	-70	A	G	.	A/G	G/G	G/G	G/G	G/G	G/G	A/G	G/G	G/G	A/G	.	G/G	G/G	G/G	.	G/G	.	.	G/G	.	A/G	G/G	A/G	.	G/G	G/G	A/G	G/G	.	.	G/G	A/G	G/G	A/G	G/G	.	A/G	G/G	A/G	A/G	G/G	A/G
oar3_OAR1_8059624	DU290101_Neighbouring SNP	OAR1	8059624	-37	A	C	.	.	C/C	A/C	.	.	.	A/C	A/C	A/C	.	.	.	C/C	.	.	C/C	A/C	.	A/C	.	.	.	.	.	A/C	A/C	.	.	.	.	A/C	A/C	.	A/C	.	.	A/C	.	.	A/C	.	.
oar3_OAR1_8059629	DU290101_Neighbouring SNP	OAR1	8059629	-32	C	T	.	.	T/T	T/T	.	.	.	C/T	C/T	C/T	C/T	.	T/T	T/T	C/T	.	T/T	C/T	.	C/T	.	C/T	T/T	C/T	.	C/T	T/T	.	T/T	.	.	T/T	C/T	.	C/T	C/T	.	C/T	T/T	.	C/T	.	.
DU290101	Parentage SNP	OAR1	8059661	0	T	C	.	T/C	C/C	C/C	C/C	C/C	C/C	T/C	C/C	C/C	T/C	.	C/C	C/C	C/C	T/C	C/C	T/C	.	C/C	.	T/C	C/C	T/C	.	C/C	C/C	T/C	C/C	.	.	C/C	T/C	C/C	T/C	C/C	.	C/C	C/C	T/C	.	C/C	.
oar3_OAR1_14316671	DU518561_Neighbouring SNP	OAR1	14316671	-59	A	T	A/T	A/T	.	.	.	.	.	.	.	.	.	.	.	.	.	.	.	.	.	A/T	T/T	.	A/T	A/T	.	.	.	.	.	.	.	.	A/T	.	A/T	.	.	.	.	A/T	.	.	.
DU518561	Parentage SNP	OAR1	14316730	0	G	A	G/A	G/A	.	G/A	A/A	G/A	G/A	G/A	G/A	.	G/A	G/A	.	.	.	G/A	.	G/A	.	G/A	A/A	.	G/A	A/A	.	A/A	A/A	A/A	G/A	.	.	A/A	A/A	A/A	G/A	.	.	A/A	.	G/A	A/A	A/A	.
oar3_OAR1_69741068	DU351298_Neighbouring SNP	OAR1	69741068	-65	C	A	.	.	.	.	.	.	.	.	.	.	.	.	.	.	.	.	.	.	.	.	.	.	.	.	.	.	.	.	.	.	.	.	.	.	.	.	.	.	.	.	.	.	.
DU351298	Parentage SNP	OAR1	69741133	0	A	C	A/C	.	A/C	C/C	A/C	C/C	C/C	A/C	C/C	A/C	C/C	C/C	A/C	.	C/C	.	A/C	A/C	C/C	C/C	C/C	.	C/C	C/C	A/C	A/C	A/C	A/C	C/C	.	A/C	C/C	A/C	A/C	C/C	C/C	A/C	A/C	C/C	C/C	A/C	C/C	A/C
oar3_OAR1_95878970	DU232924_Neighbouring SNP	OAR1	95878970	-47	G	A	.	.	.	.	.	.	.	.	.	.	.	.	.	.	.	.	.	.	.	.	.	.	.	.	.	.	.	.	.	.	.	.	.	.	.	.	.	.	.	.	.	.	.
DU232924	Parentage SNP	OAR1	95879017	0	G	A	A/A	.	A/A	A/A	.	G/A	A/A	A/A	.	G/A	G/A	G/A	G/A	G/A	A/A	G/A	A/A	A/A	A/A	A/A	.	G/A	A/A	A/A	.	.	A/A	A/A	A/A	A/A	A/A	G/A	G/A	G/A	A/A	A/A	G/A	.	A/A	A/A	A/A	A/A	A/A
oar3_OAR1_95879073	DU232924_Neighbouring SNP	OAR1	95879073	56	C	T	.	.	.	C/T	.	.	.	T/T	.	.	.	.	.	.	C/T	C/T	C/T	T/T	.	C/T	T/T	C/T	.	.	.	.	C/T	.	.	.	.	.	.	.	.	.	.	.	.	.	.	.	.
oar3_OAR1_97579999	DU271929_Neighbouring SNP	OAR1	97579999	-22	A	C	.	.	.	.	.	.	.	.	.	.	.	A/C	A/C	.	.	.	.	C/C	C/C	.	.	.	.	.	A/C	.	A/C	.	.	.	.	A/C	A/C	.	C/C	A/C	.	.	A/C	.	.	.	.
DU271929	Parentage SNP	OAR1	97580021	0	C	A	.	A/A	A/A	.	C/A	.	.	.	A/A	.	.	C/A	C/A	A/A	.	.	C/A	A/A	A/A	C/A	.	.	.	.	C/A	A/A	A/A	.	A/A	.	C/A	C/A	C/A	C/A	A/A	A/A	.	.	A/A	.	.	A/A	A/A
oar3_OAR1_97580062	DU271929_Neighbouring SNP	OAR1	97580062	41	G	C	.	.	.	.	.	.	.	.	.	.	.	.	.	.	.	.	.	.	.	.	.	.	.	.	.	.	G/C	.	.	.	.	.	.	.	.	.	.	.	G/C	.	.	.	.
oar3_OAR1_235418019	DU245892_Neighbouring SNP	OAR1	235418019	-53	T	C	C/C	C/C	T/C	.	C/C	.	C/C	C/C	C/C	C/C	.	T/C	T/C	C/C	C/C	C/C	T/C	C/C	.	T/C	C/C	C/C	T/C	C/C	C/C	.	C/C	C/C	.	.	.	T/C	T/C	C/C	C/C	C/C	T/C	.	T/C	T/C	C/C	.	T/C
oar3_OAR1_235418020	DU245892_Neighbouring SNP	OAR1	235418020	-52	G	C	G/C	.	G/C	.	C/C	.	G/C	C/C	.	.	.	G/C	G/C	.	.	G/C	.	C/C	.	G/C	C/C	G/C	.	.	.	.	.	G/C	.	.	.	G/C	G/C	G/C	C/C	.	G/C	.	G/C	G/C	G/C	.	.
oar3_OAR1_235418033	DU245892_Neighbouring SNP	OAR1	235418033	-39	T	C	.	.	T/C	.	C/C	.	T/C	C/C	.	.	T/C	T/C	T/C	.	.	T/C	.	C/C	.	T/C	C/C	T/C	.	.	.	T/C	.	T/C	.	.	.	T/C	T/C	T/C	C/C	.	T/C	.	T/C	T/C	T/C	.	.
DU245892	Parentage SNP	OAR1	235418072	0	G	A	G/A	.	G/A	.	A/A	.	G/A	A/A	.	.	G/A	G/A	.	.	.	G/A	.	A/A	.	G/A	A/A	G/A	.	G/A	.	.	.	G/A	.	A/A	.	G/A	G/A	G/A	A/A	.	.	.	G/A	G/A	.	.	.
oar3_OAR1_235418079	DU245892_Neighbouring SNP	OAR1	235418079	7	C	T	.	.	.	.	.	.	.	.	.	.	C/T	.	.	.	.	.	C/T	.	.	.	.	.	.	.	.	.	.	.	.	.	.	.	.	.	.	.	.	.	.	.	.	.	.
oar3_OAR1_235418090	DU245892_Neighbouring SNP	OAR1	235418090	18	T	C	T/C	.	T/C	.	C/C	.	T/C	C/C	.	.	T/C	T/C	.	.	.	T/C	.	C/C	.	T/C	C/C	T/C	.	T/C	.	.	.	T/C	C/C	C/C	.	C/C	T/C	T/C	C/C	.	.	.	T/C	T/C	T/C	.	.
oar3_OAR1_235418108	DU245892_Neighbouring SNP	OAR1	235418108	36	G	A	G/A	.	G/A	.	A/A	G/A	G/A	A/A	.	.	G/A	G/A	.	.	.	G/A	.	A/A	.	G/A	A/A	G/A	.	G/A	.	.	.	G/A	A/A	A/A	.	G/A	G/A	.	A/A	.	.	.	A/A	A/A	G/A	.	.
DU348827	Parentage SNP	OAR1	263074281	0	C	T	.	C/T	C/T	C/T	.	.	.	T/T	T/T	.	.	.	.	.	C/T	T/T	.	C/T	T/T	.	.	C/T	.	C/T	.	.	C/T	.	.	.	C/T	C/T	.	T/T	.	C/T	.	.	C/T	C/T	C/T	.	C/T
oar3_OAR1_273690231	DU342117_Neighbouring SNP	OAR1	273690231	-89	T	C	.	.	.	.	.	.	.	.	.	.	.	.	.	.	.	.	.	.	.	.	.	.	.	.	.	.	T/C	.	.	.	.	.	.	.	.	.	.	.	.	.	.	.	.
DU342117	Parentage SNP	OAR1	273690320	0	C	T	T/T	T/T	.	T/T	T/T	T/T	T/T	.	T/T	C/T	C/T	T/T	T/T	C/T	T/T	T/T	T/T	.	T/T	T/T	C/T	C/T	T/T	T/T	T/T	.	.	T/T	T/T	T/T	C/T	C/T	C/T	C/T	.	T/T	.	.	T/T	C/T	.	.	C/T
oar3_OAR1_273690359	DU342117_Neighbouring SNP	OAR1	273690359	39	G	A	.	.	.	.	.	.	.	.	.	.	.	.	.	G/A	.	.	.	.	.	.	.	.	.	.	.	.	.	.	.	.	.	.	.	.	.	.	.	.	.	.	.	.	.
oar3_OAR1_273690406	DU342117_Neighbouring SNP	OAR1	273690406	86	A	G	G/G	G/G	.	.	A/G	.	A/G	.	.	A/G	A/G	G/G	G/G	A/G	G/G	.	G/G	.	.	G/G	G/G	.	.	.	.	A/G	A/G	.	.	.	.	A/G	A/G	.	.	A/G	.	.	A/G	.	.	.	.
oar3_OAR1_273690410	DU342117_Neighbouring SNP	OAR1	273690410	90	G	A	A/A	A/A	A/A	.	G/A	.	G/A	G/A	.	G/A	G/A	A/A	A/A	G/A	A/A	.	A/A	.	.	A/A	A/A	.	.	.	.	G/A	A/A	.	.	.	A/A	G/A	A/A	.	.	G/A	G/A	A/A	G/A	.	A/A	.	.
DU326574	Parentage SNP	OAR2	12492887	0	G	A	G/A	G/A	.	.	A/A	G/A	.	.	A/A	G/A	G/A	G/A	G/A	.	.	.	.	G/A	.	A/A	.	.	.	A/A	.	A/A	A/A	.	G/A	G/A	G/A	A/A	.	A/A	G/A	.	A/A	A/A	A/A	.	G/A	.	.
oar3_OAR2_12492976	DU326574_Neighbouring SNP	OAR2	12492976	89	G	T	.	.	.	.	.	.	.	.	T/T	.	.	.	.	.	.	.	.	.	.	.	.	.	.	.	.	.	.	.	.	.	.	G/T	.	G/T	.	.	.	.	.	.	.	.	.
oar3_OAR2_18903570	DU502334_Neighbouring SNP	OAR2	18903570	-79	C	T	.	.	.	.	.	.	.	.	.	.	.	.	.	.	.	.	.	.	.	C/T	.	.	.	.	.	.	.	.	.	.	C/T	.	.	.	.	.	.	.	.	.	.	.	.
DU502334	Parentage SNP	OAR2	18903649	0	T	C	C/C	C/C	T/C	C/C	.	C/C	C/C	.	.	T/C	T/C	C/C	T/C	T/C	T/C	T/C	C/C	C/C	T/C	T/C	C/C	T/C	T/C	.	.	C/C	C/C	C/C	T/C	.	T/C	T/C	T/C	T/C	T/C	.	C/C	T/C	T/C	T/C	C/C	T/C	.
oar3_OAR2_18903650	DU502334_Neighbouring SNP	OAR2	18903650	1	G	A	.	.	.	.	.	.	.	.	.	.	.	.	.	.	.	.	.	.	.	.	.	.	.	.	.	.	.	.	.	.	.	.	.	.	.	.	.	.	.	.	.	.	.
oar3_OAR2_26100386	DU469454_Neighbouring SNP	OAR2	26100386	-99	C	T	.	.	C/T	C/T	.	C/T	.	.	.	.	.	.	.	.	.	.	.	.	.	.	.	.	C/T	.	.	.	.	.	.	.	.	.	.	.	.	.	C/T	.	.	.	.	.	.
DU469454	Parentage SNP	OAR2	26100485	0	T	C	.	.	T/C	T/C	.	C/C	.	.	C/C	.	.	.	C/C	.	.	.	.	.	C/C	.	C/C	C/C	.	.	C/C	.	.	.	.	.	.	T/C	T/C	T/C	T/C	.	T/C	.	T/C	.	T/C	T/C	C/C
oar3_OAR2_26100541	DU469454_Neighbouring SNP	OAR2	26100541	56	T	C	C/C	C/C	T/C	T/C	C/C	.	C/C	.	.	C/C	C/C	C/C	.	.	C/C	T/C	.	.	.	C/C	.	.	T/C	C/C	.	C/C	C/C	C/C	C/C	C/C	C/C	T/C	T/C	T/C	T/C	T/C	.	C/C	T/C	C/C	T/C	.	.
oar3_OAR2_26100584	DU469454_Neighbouring SNP	OAR2	26100584	99	C	T	T/T	T/T	C/T	C/T	T/T	.	T/T	.	.	T/T	T/T	T/T	.	T/T	T/T	C/T	C/T	.	.	T/T	.	.	C/T	T/T	.	T/T	T/T	T/T	T/T	T/T	T/T	C/T	C/T	C/T	C/T	T/T	C/T	T/T	C/T	T/T	C/T	C/T	.
oar3_OAR2_49841326	DU425907_Neighbouring SNP	OAR2	49841326	-83	C	T	.	.	.	.	.	.	.	.	.	.	.	.	.	C/T	.	.	.	.	.	.	C/T	C/T	.	.	.	.	.	.	.	.	.	C/T	.	.	.	C/T	.	.	.	.	.	.	.
DU425907	Parentage SNP	OAR2	49841409	0	T	C	.	.	C/C	.	C/C	C/C	T/C	.	.	T/C	T/C	.	T/C	.	C/C	T/C	C/C	.	C/C	.	.	.	C/C	.	.	.	T/C	.	C/C	.	C/C	T/C	.	C/C	C/C	.	.	.	.	T/C	.	.	C/C
oar3_OAR2_62482671	DU501115_Neighbouring SNP	OAR2	62482671	-66	C	T	.	T/T	.	.	.	T/T	.	.	.	C/T	T/T	T/T	T/T	C/T	.	.	T/T	.	.	T/T	.	.	.	T/T	.	.	T/T	.	.	.	C/T	T/T	C/T	C/T	T/T	T/T	T/T	.	.	T/T	.	.	C/T
oar3_OAR2_62482676	DU501115_Neighbouring SNP	OAR2	62482676	-61	T	C	.	.	.	.	.	.	.	.	.	.	.	.	.	.	.	.	.	.	.	.	.	.	.	.	.	.	C/C	.	.	.	T/C	.	T/C	.	T/C	C/C	.	.	.	T/C	.	.	.
DU501115	Parentage SNP	OAR2	62482737	0	T	C	C/C	C/C	C/C	C/C	T/C	C/C	C/C	C/C	.	T/C	C/C	C/C	C/C	T/C	C/C	T/C	C/C	C/C	.	C/C	C/C	T/C	T/C	C/C	C/C	.	C/C	C/C	C/C	C/C	T/C	C/C	T/C	T/C	C/C	C/C	C/C	.	C/C	C/C	.	.	T/C
oar3_OAR2_63063008	DU492516_Neighbouring SNP	OAR2	63063008	-88	G	A	A/A	A/A	.	G/A	A/A	G/A	.	.	.	.	A/A	A/A	A/A	G/A	A/A	G/A	A/A	.	.	G/A	.	.	A/A	A/A	.	G/A	.	.	G/A	A/A	.	G/A	.	G/A	.	A/A	G/A	G/A	G/A	.	.	.	G/A
oar3_OAR2_63063013	DU492516_Neighbouring SNP	OAR2	63063013	-83	C	T	T/T	T/T	.	C/T	T/T	C/T	.	.	C/T	.	T/T	T/T	T/T	C/T	T/T	C/T	T/T	.	.	C/T	.	.	T/T	T/T	.	C/T	.	.	C/T	T/T	C/T	C/T	.	C/T	.	T/T	C/T	C/T	C/T	.	.	T/T	C/T
oar3_OAR2_63063014	DU492516_Neighbouring SNP	OAR2	63063014	-82	G	A	.	.	.	.	.	.	.	.	.	.	.	.	.	.	.	.	.	.	.	G/A	A/A	.	.	.	.	.	.	.	.	.	.	.	.	.	.	.	.	.	G/A	.	.	.	.
oar3_OAR2_63063020	DU492516_Neighbouring SNP	OAR2	63063020	-76	T	G	.	G/G	.	.	.	.	.	.	.	.	.	T/G	T/G	.	.	.	.	.	.	.	.	.	G/G	.	.	.	.	.	.	.	.	.	.	.	.	T/G	.	.	.	.	.	.	.
DU492516	Parentage SNP	OAR2	63063096	0	A	T	T/T	T/T	.	A/T	.	A/T	.	.	A/T	.	T/T	T/T	T/T	A/T	T/T	A/T	T/T	.	.	A/T	T/T	.	T/T	A/T	.	A/T	.	.	A/T	T/T	A/T	A/T	.	A/T	.	T/T	A/T	A/T	T/T	.	.	T/T	A/T
oar3_OAR2_63063173	DU492516_Neighbouring SNP	OAR2	63063173	77	A	G	.	.	.	.	G/G	.	.	.	.	.	.	.	.	.	.	.	.	.	.	A/G	.	.	.	.	.	.	.	.	.	.	.	.	.	.	.	.	.	.	.	.	.	.	.
oar3_OAR2_63063184	DU492516_Neighbouring SNP	OAR2	63063184	88	A	T	.	.	.	.	T/T	.	.	.	.	.	.	.	.	.	.	.	.	.	.	A/T	.	.	.	.	.	.	.	.	.	.	.	.	.	.	.	.	.	.	.	.	.	.	.
DU470875	Parentage SNP	OAR2	91053562	0	G	A	G/A	G/A	A/A	A/A	.	A/A	.	A/A	G/A	A/A	A/A	G/A	A/A	G/A	G/A	A/A	A/A	A/A	A/A	G/A	G/A	G/A	A/A	.	.	G/A	A/A	A/A	G/A	A/A	A/A	G/A	.	A/A	.	G/A	.	G/A	G/A	.	.	.	A/A
oar3_OAR2_91053589	DU470875_Neighbouring SNP	OAR2	91053589	27	C	T	.	.	T/T	C/T	.	.	.	.	.	.	T/T	.	.	.	C/T	.	.	.	T/T	C/T	.	C/T	T/T	.	.	.	C/T	.	C/T	C/T	.	C/T	.	.	.	.	.	.	C/T	.	.	.	C/T
oar3_OAR2_91053600	DU470875_Neighbouring SNP	OAR2	91053600	38	G	A	.	.	.	.	.	.	.	.	.	.	.	.	.	.	.	G/A	.	.	.	.	.	.	.	.	.	.	.	G/A	.	.	.	.	.	A/A	.	G/A	.	.	.	.	.	.	.
oar3_OAR2_91053635	DU470875_Neighbouring SNP	OAR2	91053635	73	T	C	T/C	.	C/C	C/C	.	C/C	.	C/C	T/C	.	C/C	T/C	C/C	T/C	T/C	C/C	.	.	.	T/C	.	T/C	C/C	.	.	T/C	T/C	C/C	T/C	.	.	.	.	C/C	.	T/C	.	.	T/C	T/C	C/C	.	C/C
oar3_OAR2_91053642	DU470875_Neighbouring SNP	OAR2	91053642	80	T	C	T/C	.	C/C	C/C	.	C/C	.	C/C	T/C	.	C/C	T/C	C/C	T/C	T/C	.	C/C	C/C	.	T/C	.	T/C	C/C	.	C/C	T/C	C/C	.	T/C	.	.	.	.	.	.	.	.	.	T/C	T/C	C/C	.	C/C
	Parentage SNP	OAR2	100479305	0	T	C	.	.	C/C	C/C	.	C/C	.	.	T/C	T/C	T/C	T/C	T/C	C/C	T/C	T/C	.	T/C	T/C	T/C	T/C	.	.	.	T/C	.	T/C	C/C	T/C	.	.	T/C	.	T/C	.	T/C	C/C	.	T/C	C/C	C/C	.	.
oar3_OAR2_157010147	DU191879_Neighbouring SNP	OAR2	157010147	-74	A	G	.	.	.	.	.	.	.	.	.	.	.	.	.	.	.	.	.	.	.	.	.	.	.	.	.	.	.	.	.	.	.	.	.	.	.	.	.	.	.	.	.	.	.
DU191879	Parentage SNP	OAR2	157010221	0	T	C	C/C	T/C	T/C	T/C	T/C	.	C/C	T/C	C/C	T/C	T/C	C/C	C/C	T/C	.	T/C	T/C	.	C/C	C/C	C/C	C/C	C/C	T/C	C/C	C/C	T/C	C/C	C/C	T/C	C/C	T/C	T/C	T/C	T/C	.	.	T/C	.	T/C	.	C/C	T/C
oar3_OAR2_157010222	DU191879_Neighbouring SNP	OAR2	157010222	1	G	A	A/A	G/A	G/A	G/A	G/A	.	A/A	G/A	A/A	G/A	G/A	A/A	A/A	G/A	.	G/A	G/A	.	A/A	A/A	.	A/A	A/A	G/A	A/A	A/A	G/A	A/A	A/A	G/A	A/A	G/A	G/A	G/A	G/A	.	.	G/A	.	G/A	.	A/A	G/A
oar3_OAR2_157010248	DU191879_Neighbouring SNP	OAR2	157010248	27	G	A	A/A	G/A	G/A	G/A	G/A	.	G/A	G/A	A/A	G/A	G/A	G/A	A/A	G/A	.	.	G/A	A/A	.	G/A	A/A	.	.	G/A	A/A	A/A	G/A	A/A	A/A	.	G/A	.	.	G/A	.	.	.	G/A	.	G/A	G/A	.	G/A
oar3_OAR2_157010251	DU191879_Neighbouring SNP	OAR2	157010251	30	G	C	.	.	.	.	.	.	.	.	.	.	.	.	.	.	.	.	.	.	.	.	.	.	.	.	.	.	.	.	.	.	.	.	.	.	.	.	.	.	.	.	.	.	.
oar3_OAR2_157010264	DU191879_Neighbouring SNP	OAR2	157010264	43	T	A	.	.	.	.	.	.	.	.	.	.	.	.	.	.	.	.	.	.	.	.	.	.	.	.	.	.	.	.	.	.	.	.	.	.	.	.	.	.	.	.	.	.	.
oar3_OAR2_191499829	DU480434_Neighbouring SNP	OAR2	191499829	-89	T	C	.	.	.	.	.	.	.	.	.	.	.	.	.	.	.	.	.	.	.	T/C	.	.	.	.	.	.	.	.	.	.	.	.	.	.	.	.	C/C	.	.	.	.	.	.
oar3_OAR2_191499860	DU480434_Neighbouring SNP	OAR2	191499860	-58	C	A	.	.	.	.	.	.	.	.	.	.	.	.	.	.	.	.	.	.	.	C/A	.	.	.	.	.	.	.	.	.	.	.	.	.	.	.	.	A/A	.	.	.	.	.	.
	DU480434_Neighbouring SNP	OAR2	191499888	-30	G	A	.	.	.	.	.	.	.	.	.	.	.	.	.	.	.	.	.	.	.	.	.	.	.	.	.	.	.	.	.	.	.	.	.	.	.	.	A/A	.	.	.	.	.	.
DU480434	Parentage SNP	OAR2	191499918	0	A	G	A/G	G/G	.	.	.	.	A/G	A/G	G/G	.	A/G	.	.	.	.	G/G	A/G	A/G	.	.	A/G	A/G	.	.	.	A/G	G/G	A/G	A/G	.	G/G	.	.	A/G	.	.	.	.	.	.	.	.	G/G
oar3_OAR2_191499974	DU480434_Neighbouring SNP	OAR2	191499974	56	C	A	C/A	A/A	.	C/A	.	.	C/A	C/A	A/A	.	C/A	.	.	.	.	A/A	C/A	C/A	C/A	.	C/A	C/A	.	.	.	.	A/A	.	C/A	C/A	A/A	.	.	C/A	.	.	.	.	.	C/A	.	.	A/A
oar3_OAR2_225783108	DU260201_Neighbouring SNP	OAR2	225783108	-56	C	A	C/A	.	.	A/A	.	C/A	A/A	.	C/A	C/A	.	A/A	A/A	.	C/A	C/A	A/A	C/A	A/A	C/A	.	C/A	C/A	C/A	.	.	C/A	.	.	C/A	C/A	C/A	A/A	A/A	A/A	A/A	.	A/A	A/A	A/A	A/A	.	C/A
DU260201	Parentage SNP	OAR2	225783164	0	A	G	G/G	A/G	A/G	.	G/G	G/G	G/G	.	A/G	A/G	.	G/G	G/G	A/G	A/G	A/G	G/G	G/G	G/G	G/G	A/G	A/G	A/G	G/G	.	.	A/G	.	.	A/G	G/G	A/G	G/G	G/G	A/G	G/G	A/G	G/G	G/G	G/G	G/G	A/G	A/G
oar3_OAR2_236221053	DU503161_Neighbouring SNP	OAR2	236221053	-87	C	T	.	C/T	C/T	C/T	.	C/T	.	.	.	.	T/T	.	C/T	.	.	.	C/T	.	C/T	.	.	C/T	T/T	.	.	C/T	T/T	.	C/T	.	C/T	C/T	.	C/T	.	.	C/T	.	.	.	.	.	T/T
oar3_OAR2_236221107	DU503161_Neighbouring SNP	OAR2	236221107	-33	T	C	T/C	T/C	T/C	T/C	T/C	.	.	C/C	T/C	T/C	.	C/C	T/C	C/C	T/C	T/C	.	C/C	.	C/C	T/C	T/C	.	C/C	.	.	.	.	T/C	.	T/C	T/C	C/C	T/C	C/C	C/C	.	C/C	C/C	C/C	.	T/C	.
DU503161	Parentage SNP	OAR2	236221140	0	C	A	C/A	C/A	.	C/A	C/A	.	.	A/A	.	.	.	C/A	.	A/A	C/A	.	.	C/A	.	A/A	C/A	C/A	.	A/A	C/A	.	.	.	C/A	.	.	.	A/A	C/A	.	A/A	.	.	A/A	A/A	.	C/A	.
oar3_OAR2_236221185	DU503161_Neighbouring SNP	OAR2	236221185	45	T	C	.	.	.	.	.	.	.	C/C	T/C	T/C	.	.	.	C/C	.	.	.	T/C	T/C	.	.	.	.	.	T/C	.	.	.	.	T/C	.	.	C/C	T/C	C/C	C/C	.	.	.	T/C	.	.	.
oar3_OAR2_236221224	DU503161_Neighbouring SNP	OAR2	236221224	84	A	G	G/G	G/G	G/G	G/G	G/G	G/G	G/G	G/G	G/G	A/G	G/G	G/G	G/G	G/G	G/G	.	G/G	G/G	.	G/G	G/G	G/G	G/G	G/G	A/G	G/G	G/G	G/G	G/G	G/G	G/G	G/G	G/G	G/G	A/G	G/G	G/G	G/G	G/G	G/G	G/G	.	G/G
oar3_OAR3_21793457	DU425259_Neighbouring SNP	OAR3	21793457	-78	T	C	.	.	.	.	.	.	.	.	.	.	T/C	.	.	.	.	.	.	.	.	T/C	T/C	.	.	.	.	.	.	.	.	T/C	.	.	.	.	.	.	.	.	.	T/C	.	.	.
oar3_OAR3_21793473	DU425259_Neighbouring SNP	OAR3	21793473	-62	A	G	G/G	.	A/G	.	.	A/G	A/G	.	G/G	A/G	A/G	.	.	.	A/G	.	A/G	.	A/G	G/G	A/G	.	.	A/G	.	G/G	A/G	.	A/G	G/G	.	A/G	.	.	.	.	.	.	A/G	G/G	.	A/G	.
oar3_OAR3_21793481	DU425259_Neighbouring SNP	OAR3	21793481	-54	A	T	.	.	.	.	.	.	.	.	.	.	.	.	.	.	.	.	.	.	.	.	.	.	.	.	.	.	.	.	.	.	.	.	.	.	.	.	.	.	.	.	.	.	.
oar3_OAR3_21793495	DU425259_Neighbouring SNP	OAR3	21793495	-40	C	A	.	.	.	.	.	.	.	.	.	.	C/A	.	.	.	.	.	.	.	.	C/A	C/A	.	.	.	.	.	.	.	.	C/A	.	.	.	.	.	.	.	.	.	C/A	.	.	.
DU425259	Parentage SNP	OAR3	21793535	0	T	C	C/C	T/C	C/C	T/C	.	T/C	T/C	.	C/C	T/C	.	.	.	.	T/C	.	C/C	.	T/C	C/C	T/C	.	T/C	T/C	.	C/C	T/C	.	T/C	C/C	.	T/C	T/C	C/C	.	.	.	T/C	T/C	C/C	C/C	T/C	T/C
oar3_OAR3_59477712	DU231007_Neighbouring SNP	OAR3	59477712	-79	A	G	A/G	A/G	.	.	.	.	.	.	.	.	A/G	.	A/G	.	A/G	.	G/G	.	A/G	.	.	.	.	.	.	A/G	.	.	.	A/G	.	A/G	G/G	.	A/G	.	.	G/G	.	.	.	.	.
oar3_OAR3_59477754	DU231007_Neighbouring SNP	OAR3	59477754	-37	A	C	.	.	.	.	.	.	.	.	C/C	A/C	.	.	.	A/C	.	.	.	.	.	.	.	.	.	.	.	.	.	.	.	.	.	.	.	.	A/C	.	.	.	.	.	.	.	.
DU231007	Parentage SNP	OAR3	59477791	0	T	C	T/C	T/C	C/C	T/C	T/C	.	.	.	.	T/C	T/C	C/C	.	.	.	C/C	.	T/C	.	.	T/C	.	C/C	T/C	.	T/C	C/C	C/C	T/C	.	.	T/C	.	.	.	.	.	.	C/C	.	T/C	.	.
oar3_OAR3_59477853	DU231007_Neighbouring SNP	OAR3	59477853	62	G	A	.	.	.	.	G/A	.	.	.	.	.	.	.	.	.	.	.	.	.	.	.	.	.	.	.	.	.	.	.	G/A	G/A	G/A	.	.	.	.	.	.	.	.	.	.	.	.
DU225323	Parentage SNP	OAR3	91261067	0	T	C	.	C/C	.	.	T/C	T/C	T/C	T/C	.	C/C	T/C	.	C/C	T/C	T/C	.	C/C	.	.	.	T/C	T/C	C/C	.	.	T/C	T/C	.	C/C	.	T/C	T/C	T/C	T/C	.	C/C	T/C	C/C	T/C	T/C	.	.	.
oar3_OAR3_91261105	DU225323_Neighbouring SNP	OAR3	91261105	38	G	C	.	.	.	.	G/C	.	.	G/C	G/C	C/C	G/C	.	.	.	G/C	.	C/C	.	.	.	.	C/C	.	.	.	G/C	G/C	.	.	.	.	G/C	G/C	G/C	.	C/C	.	G/C	G/C	G/C	.	.	.
oar3_OAR3_91261142	DU225323_Neighbouring SNP	OAR3	91261142	75	T	C	C/C	C/C	C/C	C/C	C/C	C/C	C/C	C/C	C/C	C/C	C/C	C/C	C/C	C/C	C/C	C/C	C/C	C/C	T/C	C/C	.	C/C	C/C	C/C	.	C/C	C/C	C/C	C/C	C/C	C/C	C/C	C/C	C/C	C/C	C/C	C/C	C/C	C/C	C/C	C/C	.	C/C
DU260081	Parentage SNP	OAR3	109027227	0	T	C	.	.	.	.	.	.	.	.	.	.	.	.	.	.	.	.	.	.	.	.	.	.	.	.	.	.	.	.	.	.	.	.	.	.	.	.	.	.	.	.	.	.	.
oar3_OAR3_109027228	DU260081_Neighbouring SNP	OAR3	109027228	1	C	T	T/T	T/T	.	C/T	.	C/T	T/T	.	.	.	.	T/T	C/T	.	.	.	.	.	C/T	T/T	.	C/T	C/T	C/T	.	.	T/T	C/T	T/T	T/T	C/T	C/T	.	.	.	T/T	C/T	T/T	.	C/T	.	.	C/T
oar3_OAR3_158501162	DU259120_Neighbouring SNP	OAR3	158501162	-69	T	C	C/C	C/C	T/C	C/C	C/C	C/C	C/C	C/C	T/C	T/C	C/C	C/C	C/C	.	C/C	T/C	C/C	C/C	C/C	C/C	C/C	C/C	C/C	C/C	T/C	C/C	T/C	C/C	C/C	.	C/C	C/C	C/C	C/C	C/C	C/C	.	C/C	C/C	C/C	C/C	.	C/C
oar3_OAR3_158501183	DU259120_Neighbouring SNP	OAR3	158501183	-48	A	G	G/G	G/G	A/G	G/G	G/G	G/G	G/G	G/G	A/G	A/G	G/G	G/G	G/G	.	G/G	A/G	G/G	G/G	G/G	G/G	G/G	G/G	G/G	G/G	A/G	G/G	.	G/G	G/G	.	G/G	G/G	G/G	G/G	G/G	G/G	.	G/G	G/G	G/G	G/G	.	.
DU259120	Parentage SNP	OAR3	158501231	0	G	A	.	.	.	G/A	.	A/A	G/A	.	.	G/A	.	A/A	G/A	.	G/A	G/A	G/A	.	.	G/A	G/A	G/A	.	A/A	.	G/A	.	A/A	.	.	G/A	G/A	.	.	G/A	.	.	.	A/A	.	A/A	G/A	.
oar3_OAR3_158501270	DU259120_Neighbouring SNP	OAR3	158501270	39	G	A	.	.	.	.	G/A	.	.	.	.	.	.	.	.	.	.	.	.	.	.	.	.	.	.	.	.	.	.	.	.	.	.	.	.	.	.	.	.	.	.	.	.	.	.
oar3_OAR3_158501273	DU259120_Neighbouring SNP	OAR3	158501273	42	C	T	.	C/T	.	.	.	.	.	.	.	.	C/T	.	.	.	.	.	.	.	.	.	C/T	C/T	.	.	.	C/T	.	.	.	.	.	.	.	.	.	.	.	T/T	.	.	.	.	.
oar3_OAR3_181879393	DU394537_Neighbouring SNP	OAR3	181879393	-77	C	G	.	G/G	G/G	.	G/G	C/G	G/G	.	.	.	C/G	.	G/G	.	.	C/G	.	C/G	.	G/G	G/G	.	G/G	.	.	.	C/G	G/G	.	.	.	.	.	.	.	.	C/G	.	.	.	.	.	C/G
oar3_OAR3_181879403	DU394537_Neighbouring SNP	OAR3	181879403	-67	A	T	.	.	.	.	.	.	.	.	.	.	.	.	.	.	.	.	.	.	.	.	.	.	.	.	.	.	.	.	.	.	.	.	.	.	.	.	.	.	.	.	.	.	.
DU394537	Parentage SNP	OAR3	181879470	0	T	C	T/C	C/C	C/C	.	C/C	T/C	C/C	.	.	.	T/C	.	C/C	.	.	T/C	.	T/C	.	C/C	.	.	C/C	.	.	.	C/C	C/C	T/C	.	T/C	.	.	.	.	.	T/C	.	T/C	.	.	.	T/C
oar3_OAR3_181879489	DU394537_Neighbouring SNP	OAR3	181879489	19	G	A	.	.	.	.	.	.	.	.	.	.	.	.	.	.	.	.	.	.	.	.	.	.	.	.	.	.	.	.	.	.	.	.	.	.	.	.	.	.	.	.	.	.	.
CL635241	Parentage SNP	OAR3	182202867	0	T	C	T/C	.	.	.	C/C	T/C	C/C	T/C	.	.	.	T/C	C/C	T/C	.	C/C	.	C/C	C/C	C/C	C/C	.	C/C	C/C	C/C	T/C	T/C	C/C	C/C	.	.	.	.	T/C	.	.	T/C	.	.	C/C	T/C	C/C	T/C
oar3_OAR3_205405168	DU408817_Neighbouring SNP	OAR3	205405168	-66	C	T	.	C/T	C/T	C/T	.	C/T	.	C/T	C/T	.	C/T	C/T	C/T	.	.	C/T	.	C/T	.	.	T/T	.	.	.	.	.	.	C/T	C/T	.	T/T	.	C/T	C/T	C/T	C/T	C/T	C/T	.	.	.	.	C/T
oar3_OAR3_205405208	DU408817_Neighbouring SNP	OAR3	205405208	-26	T	C	.	.	.	.	.	.	.	T/C	.	T/C	T/C	.	.	.	.	T/C	.	.	.	.	.	.	T/C	.	.	.	.	.	.	T/C	.	.	.	.	.	.	.	.	.	C/C	.	T/C	.
DU408817	Parentage SNP	OAR3	205405234	0	G	A	G/A	G/A	G/A	G/A	.	.	.	G/A	G/A	.	G/A	G/A	G/A	.	.	.	.	A/A	A/A	.	G/A	.	.	.	.	.	.	G/A	.	.	A/A	.	G/A	G/A	G/A	G/A	G/A	G/A	G/A	.	.	.	G/A
oar3_OAR4_58900877	DU202116_Neighbouring SNP	OAR4	58900877	-70	T	C	.	.	.	.	.	.	T/C	C/C	.	.	.	.	T/C	T/C	.	.	T/C	.	T/C	T/C	.	.	.	.	.	T/C	.	.	.	.	.	.	.	.	.	.	T/C	.	.	.	.	.	.
oar3_OAR4_58900885	DU202116_Neighbouring SNP	OAR4	58900885	-62	T	A	.	.	.	.	.	.	T/A	A/A	.	.	.	.	T/A	T/A	.	.	T/A	.	.	.	.	.	.	.	.	T/A	.	.	.	.	.	.	.	.	.	.	.	.	.	.	.	.	.
oar3_OAR4_58900930	DU202116_Neighbouring SNP	OAR4	58900930	-17	C	T	.	.	.	.	.	.	.	.	.	.	.	.	.	.	.	.	.	.	.	.	.	.	.	.	.	.	.	.	.	.	.	.	.	.	.	.	.	.	.	.	.	.	.
DU202116	Parentage SNP	OAR4	58900947	0	G	A	G/A	A/A	.	.	.	G/A	G/A	A/A	.	.	G/A	G/A	G/A	A/A	A/A	.	G/A	G/A	A/A	A/A	A/A	.	.	A/A	.	G/A	.	.	.	.	G/A	A/A	G/A	G/A	G/A	A/A	A/A	A/A	A/A	.	.	.	.
oar3_OAR4_58900965	DU202116_Neighbouring SNP	OAR4	58900965	18	A	C	.	.	.	.	.	.	.	.	.	.	.	.	.	.	.	.	.	.	.	.	.	.	.	.	.	.	.	.	.	.	.	.	.	.	.	.	.	.	.	.	.	.	.
DU460511	Parentage SNP	OAR4	61862822	0	C	T	T/T	T/T	.	T/T	.	C/T	C/T	.	.	T/T	C/T	.	C/T	C/T	T/T	C/T	C/T	T/T	.	T/T	.	C/T	T/T	T/T	C/T	C/T	T/T	C/T	.	T/T	T/T	C/T	C/T	T/T	C/T	T/T	.	.	T/T	T/T	.	T/T	C/T
oar3_OAR4_61862912	DU460511_Neighbouring SNP	OAR4	61862912	90	G	T	G/T	.	G/T	.	.	.	.	.	.	.	G/T	.	.	.	G/T	T/T	.	G/T	.	G/T	G/T	T/T	.	.	.	.	G/T	.	G/T	.	.	.	.	.	.	.	G/T	T/T	G/T	G/T	G/T	.	.
DU305004	Parentage SNP	OAR4	70754178	0	C	T	.	T/T	.	.	C/T	.	.	C/T	.	.	.	.	C/T	.	T/T	C/T	C/T	.	.	C/T	C/T	.	.	.	.	C/T	C/T	.	C/T	.	.	C/T	C/T	C/T	T/T	.	.	.	.	.	.	.	C/T
oar3_OAR4_73699610	DU369175_Neighbouring SNP	OAR4	73699610	-84	C	A	.	C/A	.	.	.	C/A	.	.	.	.	.	.	.	.	A/A	.	.	.	.	C/A	.	.	.	C/A	C/A	.	.	.	.	.	.	.	.	.	.	C/A	C/A	.	.	C/A	.	.	.
oar3_OAR4_73699629	DU369175_Neighbouring SNP	OAR4	73699629	-65	G	A	.	G/A	.	.	.	G/A	.	.	.	.	.	.	.	.	A/A	.	.	.	.	G/A	.	.	.	G/A	G/A	.	.	.	.	.	.	.	.	.	.	G/A	G/A	.	A/A	G/A	.	.	.
DU369175	Parentage SNP	OAR4	73699694	0	A	G	G/G	G/G	.	.	.	A/G	G/G	.	.	.	.	A/G	A/G	G/G	G/G	A/G	G/G	.	.	G/G	A/G	.	.	A/G	G/G	.	.	.	.	A/G	A/G	A/G	G/G	G/G	G/G	G/G	A/G	G/G	G/G	A/G	.	.	.
oar3_OAR4_73699775	DU369175_Neighbouring SNP	OAR4	73699775	81	T	G	G/G	T/G	.	.	.	.	G/G	.	.	.	T/G	T/G	T/G	G/G	.	T/G	G/G	.	.	T/G	T/G	.	.	.	T/G	.	.	.	.	.	T/G	T/G	G/G	G/G	G/G	T/G	.	G/G	.	.	.	.	.
oar3_OAR4_73699789	DU369175_Neighbouring SNP	OAR4	73699789	95	A	C	C/C	A/C	.	.	.	.	C/C	.	.	.	A/C	A/C	A/C	C/C	.	A/C	C/C	.	.	A/C	A/C	.	.	.	A/C	.	.	.	.	.	A/C	A/C	C/C	C/C	C/C	A/C	.	C/C	.	.	.	.	.
oar3_OAR4_73699790	DU369175_Neighbouring SNP	OAR4	73699790	96	A	G	.	A/G	.	.	.	A/G	.	.	.	.	.	.	.	.	G/G	.	.	.	.	A/G	.	.	.	A/G	A/G	.	.	.	.	.	.	.	.	.	.	A/G	A/G	.	G/G	.	.	.	.
oar3_OAR4_73699794	DU369175_Neighbouring SNP	OAR4	73699794	100	C	T	.	.	.	.	C/T	.	.	.	.	.	.	.	.	.	.	.	.	.	.	.	.	.	C/T	.	.	.	.	.	.	.	.	.	.	.	.	.	.	.	.	C/T	.	.	.
oar3_OAR5_12323314	DU446213_Neighbouring SNP	OAR5	12323314	-83	A	G	.	.	.	.	.	.	.	.	.	.	.	.	.	.	.	.	.	.	.	.	.	.	.	.	.	.	.	.	.	.	.	.	.	.	.	.	.	.	.	.	.	.	.
DU446213	Parentage SNP	OAR5	12323397	0	C	T	T/T	C/T	.	C/T	C/T	.	.	C/T	T/T	.	C/T	.	T/T	T/T	.	.	.	.	.	.	.	.	T/T	.	C/T	C/T	T/T	C/T	C/T	.	C/T	.	C/T	C/T	C/T	.	.	C/T	.	C/T	C/T	.	.
oar3_OAR5_12323448	DU446213_Neighbouring SNP	OAR5	12323448	51	A	G	.	.	.	.	.	.	.	.	.	.	.	.	.	.	.	.	.	.	.	.	.	.	.	.	.	.	.	.	.	.	.	.	.	.	.	.	.	.	.	.	.	.	.
oar3_OAR5_55516226	DU444709_Neighbouring SNP	OAR5	55516226	-56	C	T	.	.	.	.	.	.	.	.	.	.	.	.	.	.	.	.	.	.	.	.	.	.	.	.	.	.	.	.	C/T	.	C/T	.	.	.	.	.	C/T	.	.	.	.	.	.
oar3_OAR5_55516260	DU444709_Neighbouring SNP	OAR5	55516260	-22	G	C	.	.	C/C	G/C	G/C	G/C	.	.	G/C	.	.	G/C	G/C	.	G/C	G/C	.	.	C/C	.	G/C	G/C	G/C	.	.	.	G/C	G/C	G/C	C/C	.	.	.	.	.	C/C	.	G/C	.	.	G/C	G/C	.
oar3_OAR5_55516273	DU444709_Neighbouring SNP	OAR5	55516273	-9	A	T	.	.	.	.	.	.	.	.	.	.	.	.	.	.	.	.	.	.	.	.	.	.	.	.	.	.	.	.	A/T	.	A/T	.	.	.	.	.	A/T	.	.	.	.	.	.
DU444709	Parentage SNP	OAR5	55516282	0	A	G	A/G	.	G/G	A/G	A/G	A/G	G/G	.	A/G	.	A/G	A/G	A/G	G/G	G/G	G/G	.	A/G	G/G	A/G	A/G	A/G	G/G	.	A/G	A/G	G/G	A/G	G/G	G/G	A/G	.	A/G	A/G	A/G	G/G	G/G	A/G	.	.	A/G	A/G	.
oar3_OAR5_64317238	DU453259_Neighbouring SNP	OAR5	64317238	-94	A	G	.	.	.	.	.	.	.	A/G	.	.	.	.	.	.	.	.	.	.	.	.	A/G	.	.	.	.	.	.	.	.	.	.	.	.	A/G	.	.	.	.	.	.	.	.	.
oar3_OAR5_64317246	DU453259_Neighbouring SNP	OAR5	64317246	-86	A	G	.	A/G	G/G	A/G	.	.	G/G	A/G	.	.	.	A/G	.	A/G	.	A/G	.	A/G	.	G/G	A/G	G/G	G/G	.	.	.	.	G/G	A/G	A/G	.	.	A/G	G/G	.	A/G	.	G/G	A/G	G/G	.	.	A/G
DU453259	Parentage SNP	OAR5	64317332	0	T	C	.	.	.	.	.	C/C	C/C	T/C	.	.	T/C	T/C	.	.	.	.	.	.	T/C	.	T/C	.	T/C	.	.	.	.	C/C	T/C	C/C	.	C/C	T/C	C/C	T/C	C/C	.	.	.	.	.	.	T/C
oar3_OAR5_64317366	DU453259_Neighbouring SNP	OAR5	64317366	34	T	A	T/A	T/A	.	T/A	A/A	.	.	.	.	T/A	T/A	T/A	T/A	T/A	A/A	T/A	.	.	.	.	.	.	.	.	.	T/A	.	.	.	.	A/A	.	.	.	T/A	.	A/A	.	T/A	.	T/A	T/A	.
oar3_OAR6_2049280	DU325267_Neighbouring SNP	OAR6	2049280	-68	G	T	.	.	.	.	.	.	.	.	.	G/T	.	.	.	.	.	.	.	.	.	.	.	.	.	.	.	G/T	.	.	.	.	.	.	.	.	.	.	.	.	.	.	.	.	.
DU325267	Parentage SNP	OAR6	2049348	0	T	A	T/A	.	T/A	.	T/A	A/A	.	T/A	A/A	A/A	A/A	T/A	.	A/A	.	.	.	T/A	.	A/A	A/A	.	.	.	.	A/A	A/A	T/A	A/A	.	.	A/A	T/A	A/A	T/A	.	T/A	T/A	T/A	T/A	.	.	T/A
oar3_OAR6_2049390	DU325267_Neighbouring SNP	OAR6	2049390	42	A	T	.	.	.	.	.	.	.	.	.	A/T	.	.	.	.	.	.	.	.	.	.	.	.	.	.	.	A/T	.	.	.	.	.	.	.	.	.	.	.	.	.	.	.	.	.
oar3_OAR6_56592284	DU194639_Neighbouring SNP	OAR6	56592284	-97	C	A	C/A	.	.	C/A	.	.	.	.	.	.	.	.	.	.	.	.	.	C/A	.	.	.	.	.	C/A	.	.	C/A	.	.	.	.	.	.	.	.	.	.	.	.	.	.	.	.
oar3_OAR6_56592288	DU194639_Neighbouring SNP	OAR6	56592288	-93	G	A	G/A	.	.	G/A	.	.	.	.	.	.	.	.	.	.	.	.	.	G/A	.	.	.	.	.	G/A	.	.	G/A	.	.	.	.	.	.	.	.	.	.	.	.	.	.	.	.
oar3_OAR6_56592336	DU194639_Neighbouring SNP	OAR6	56592336	-45	A	G	A/G	.	.	.	A/G	A/G	.	.	A/G	.	A/G	A/G	A/G	.	.	A/G	.	A/G	.	A/G	.	.	.	G/G	A/G	A/G	A/G	.	.	A/G	.	.	.	.	.	A/G	A/G	.	G/G	.	.	.	.
DU194639	Parentage SNP	OAR6	56592381	0	T	C	C/C	C/C	T/C	T/C	C/C	T/C	C/C	C/C	T/C	C/C	.	T/C	.	C/C	.	C/C	T/C	T/C	T/C	T/C	C/C	T/C	C/C	T/C	.	.	T/C	T/C	C/C	T/C	T/C	T/C	.	C/C	.	.	.	.	C/C	.	C/C	T/C	T/C
oar3_OAR6_56592388	DU194639_Neighbouring SNP	OAR6	56592388	7	T	C	.	.	.	.	T/C	.	.	.	.	.	.	.	.	.	.	.	.	.	.	.	.	.	.	.	.	.	.	.	.	.	.	.	.	.	.	.	.	.	.	.	T/C	.	T/C
oar3_OAR6_56592406	DU194639_Neighbouring SNP	OAR6	56592406	25	C	G	C/G	C/G	.	C/G	C/G	.	.	.	.	.	.	.	.	.	.	C/G	.	.	.	C/G	.	.	.	C/G	.	.	C/G	.	.	C/G	.	.	.	.	.	.	.	.	G/G	.	.	.	.
oar3_OAR6_56592429	DU194639_Neighbouring SNP	OAR6	56592429	48	G	T	G/T	G/T	.	G/T	G/T	.	.	.	.	.	.	.	.	.	.	G/T	.	G/T	.	G/T	.	.	.	G/T	.	.	G/T	.	.	G/T	.	.	.	.	.	.	.	.	T/T	.	.	.	.
CZ925803	Parentage SNP	OAR6	100552392	0	G	A	G/A	G/A	G/A	.	A/A	G/A	.	.	.	G/A	.	A/A	.	G/A	A/A	.	.	.	G/A	A/A	.	.	A/A	.	.	G/A	G/A	.	G/A	G/A	G/A	G/A	.	A/A	.	G/A	A/A	.	.	A/A	G/A	.	G/A
oar3_OAR6_100552457	CZ925803_Neighbouring SNP	OAR6	100552457	65	G	T	G/T	G/T	G/T	.	T/T	G/T	.	.	.	G/T	.	T/T	.	G/T	T/T	.	.	.	G/T	T/T	.	.	T/T	.	G/T	G/T	G/T	.	G/T	G/T	G/T	.	G/T	T/T	.	G/T	T/T	.	.	T/T	G/T	.	G/T
oar3_OAR6_100552474	CZ925803_Neighbouring SNP	OAR6	100552474	82	T	A	T/A	T/A	T/A	.	A/A	T/A	.	.	.	T/A	.	A/A	.	T/A	A/A	.	.	.	T/A	A/A	.	.	A/A	.	T/A	T/A	T/A	.	T/A	T/A	T/A	.	T/A	A/A	.	T/A	A/A	.	.	A/A	T/A	.	T/A
DU337465	Parentage SNP	OAR6	105739776	0	C	T	.	.	.	C/T	.	.	T/T	.	.	.	.	C/T	C/T	C/T	.	.	.	C/T	C/T	.	C/T	.	C/T	.	.	.	C/T	.	.	.	T/T	C/T	C/T	C/T	.	T/T	.	C/T	T/T	.	C/T	.	T/T
oar3_OAR6_105739810	DU337465_Neighbouring SNP	OAR6	105739810	34	C	T	T/T	C/T	C/T	C/T	C/T	T/T	T/T	T/T	T/T	T/T	C/T	T/T	C/T	T/T	.	T/T	T/T	T/T	C/T	C/T	T/T	.	T/T	T/T	T/T	C/T	T/T	.	T/T	T/T	.	T/T	T/T	T/T	T/T	T/T	C/T	T/T	T/T	C/T	C/T	.	T/T
oar3_OAR6_105739818	DU337465_Neighbouring SNP	OAR6	105739818	42	A	G	.	.	.	A/G	.	A/G	G/G	.	.	.	.	.	A/G	.	.	.	A/G	A/G	A/G	.	A/G	.	A/G	.	.	.	A/G	.	.	.	G/G	A/G	A/G	A/G	.	G/G	.	A/G	G/G	.	A/G	.	A/G
oar3_OAR6_105739865	DU337465_Neighbouring SNP	OAR6	105739865	89	C	T	.	.	.	.	.	C/T	T/T	.	.	.	.	.	.	.	.	.	.	.	.	.	C/T	.	.	.	.	.	.	.	.	.	.	.	.	.	.	.	.	.	.	.	.	.	.
oar3_OAR6_114778593	_Neighbouring SNP	OAR6	114778593	-90	G	A	A/A	.	G/A	G/A	.	A/A	.	G/A	G/A	.	.	.	.	.	.	.	.	.	G/A	.	.	A/A	.	.	.	.	.	.	.	.	.	.	.	.	.	.	.	.	.	.	.	G/A	.
oar3_OAR6_114778607	CL635944_Neighbouring SNP	OAR6	114778607	-76	G	A	.	.	.	.	.	.	.	.	.	.	.	.	.	.	.	.	.	.	.	.	.	.	.	.	.	.	.	.	.	.	.	.	.	.	.	.	.	.	.	.	.	.	.
oar3_OAR6_114778611	CL635944_Neighbouring SNP	OAR6	114778611	-72	A	G	.	.	.	.	.	.	.	.	.	.	A/G	.	.	.	.	.	.	A/G	.	.	.	.	.	.	.	.	G/G	.	.	.	.	.	.	A/G	.	A/G	.	.	.	.	.	.	.
oar3_OAR6_114778627	CL635944_Neighbouring SNP	OAR6	114778627	-56	T	C	.	.	.	.	.	.	C/C	.	.	.	.	T/C	.	.	T/C	T/C	T/C	.	.	.	.	.	C/C	C/C	.	.	.	T/C	.	.	.	.	.	.	.	.	.	.	.	.	.	.	.
oar3_OAR6_114778655	CL635944_Neighbouring SNP	OAR6	114778655	-28	C	T	.	T/T	C/T	.	.	.	T/T	.	.	.	T/T	C/T	C/T	T/T	C/T	T/T	C/T	T/T	C/T	T/T	T/T	.	T/T	T/T	T/T	T/T	T/T	T/T	C/T	T/T	T/T	T/T	C/T	C/T	T/T	T/T	.	.	C/T	.	C/T	.	C/T
oar3_OAR6_114778682	CL635944_Neighbouring SNP	OAR6	114778682	-1	C	T	.	.	.	.	.	.	T/T	.	.	.	.	C/T	.	.	C/T	.	C/T	.	.	.	.	.	T/T	T/T	C/T	.	.	C/T	.	.	.	.	.	.	.	.	.	.	.	.	.	.	.
CL635944	Parentage SNP	OAR6	114778683	0	A	G	.	G/G	A/G	.	.	.	.	.	.	.	G/G	.	A/G	G/G	.	A/G	.	G/G	A/G	.	G/G	.	.	.	A/G	G/G	G/G	A/G	A/G	G/G	G/G	G/G	A/G	A/G	G/G	G/G	.	.	A/G	.	A/G	.	A/G
oar3_OAR6_114778718	CL635944_Neighbouring SNP	OAR6	114778718	35	T	C	.	C/C	.	T/C	.	.	.	.	.	.	T/C	.	T/C	T/C	.	.	.	T/C	T/C	.	C/C	.	.	.	.	C/C	.	T/C	T/C	C/C	.	C/C	T/C	.	T/C	T/C	.	.	T/C	.	.	.	T/C
oar3_OAR6_114778724	CL635944_Neighbouring SNP	OAR6	114778724	41	C	T	.	C/T	C/T	.	.	.	.	.	.	.	.	.	C/T	C/T	.	.	.	.	C/T	.	T/T	.	.	.	.	T/T	.	.	.	C/T	.	T/T	.	.	.	C/T	.	.	.	.	.	.	C/T
oar3_OAR6_114778726	CL635944_Neighbouring SNP	OAR6	114778726	43	C	T	.	.	.	.	.	.	.	.	.	.	.	.	.	.	.	.	.	.	.	.	.	.	.	.	.	.	.	.	.	.	.	.	.	.	.	.	.	.	.	.	.	.	.
oar3_OAR6_114778758	CL635944_Neighbouring SNP	OAR6	114778758	75	G	A	.	.	.	.	.	.	.	.	.	.	.	.	.	.	.	.	.	.	.	.	.	.	.	.	.	.	.	.	.	.	.	.	.	.	.	.	.	.	.	.	.	.	.
oar3_OAR7_10616304	DU467751_Neighbouring SNP	OAR7	10616304	-79	C	T	.	.	.	.	.	.	C/T	.	.	.	.	.	.	.	C/T	C/T	.	.	T/T	.	.	.	.	.	.	C/T	.	.	.	.	.	.	.	C/T	.	.	.	.	.	.	.	C/T	.
DU467751	Parentage SNP	OAR7	10616383	0	T	C	C/C	.	C/C	.	.	.	T/C	T/C	C/C	C/C	C/C	T/C	C/C	.	C/C	C/C	T/C	T/C	C/C	C/C	C/C	C/C	T/C	C/C	C/C	C/C	C/C	C/C	.	.	C/C	C/C	C/C	C/C	C/C	T/C	T/C	C/C	C/C	.	T/C	.	C/C
oar3_OAR7_10616441	DU467751_Neighbouring SNP	OAR7	10616441	58	T	C	.	.	.	.	.	.	.	.	.	.	C/C	T/C	.	.	.	.	.	T/C	.	.	.	.	.	.	.	.	.	.	.	.	.	T/C	T/C	.	.	.	.	T/C	T/C	.	.	.	.
DU499587	Parentage SNP	OAR7	73979625	0	G	A	A/A	G/A	G/A	.	.	.	G/A	.	.	.	.	A/A	A/A	G/A	.	G/A	.	.	A/A	A/A	.	.	.	.	.	.	G/A	A/A	.	.	.	G/A	G/A	.	G/A	.	G/A	.	A/A	.	.	A/A	.
oar3_OAR7_74851526	CZ920950_Neighbouring SNP	OAR7	74851526	-69	G	A	.	.	.	G/A	.	.	.	.	.	.	.	.	.	.	.	.	G/A	.	.	.	.	.	.	.	.	G/A	.	.	.	.	.	.	.	G/A	.	.	.	.	.	.	.	.	.
CZ920950	Parentage SNP	OAR7	74851595	0	G	A	A/A	.	.	A/A	.	A/A	A/A	.	.	A/A	G/A	.	.	G/A	.	.	G/A	A/A	.	G/A	G/A	.	.	G/A	.	.	G/A	G/A	A/A	.	.	.	A/A	A/A	G/A	.	.	G/A	A/A	A/A	.	.	G/A
oar3_OAR7_74851645	CZ920950_Neighbouring SNP	OAR7	74851645	50	T	C	C/C	.	.	C/C	.	C/C	C/C	.	.	C/C	T/C	.	.	T/C	.	.	.	C/C	T/C	T/C	T/C	.	.	T/C	.	.	T/C	T/C	C/C	.	T/C	.	C/C	C/C	T/C	.	.	.	C/C	C/C	.	.	T/C
DU530067	Parentage SNP	OAR7	99837532	0	C	T	T/T	T/T	C/T	T/T	C/T	C/T	T/T	T/T	T/T	T/T	C/T	C/T	T/T	T/T	.	T/T	T/T	.	T/T	C/T	C/T	C/T	T/T	.	.	C/T	T/T	T/T	C/T	.	T/T	C/T	.	T/T	C/T	T/T	.	.	C/T	T/T	T/T	.	T/T
oar3_OAR7_99837631	DU530067_Neighbouring SNP	OAR7	99837631	99	A	G	G/G	G/G	A/G	A/G	.	A/G	.	A/G	A/G	.	A/G	.	A/G	G/G	.	.	G/G	A/G	G/G	A/G	A/G	.	A/G	.	.	A/G	G/G	.	.	.	.	A/G	.	A/G	.	A/G	.	.	A/G	.	.	.	A/G
oar3_OAR8_6522146	DU213735_Neighbouring SNP	OAR8	6522146	-95	A	G	A/G	A/G	.	G/G	.	A/G	A/G	A/G	.	.	A/G	G/G	A/G	.	.	.	A/G	G/G	G/G	A/G	.	G/G	A/G	A/G	A/G	A/G	.	.	.	A/G	A/G	.	.	A/G	A/G	A/G	.	A/G	G/G	A/G	G/G	A/G	.
DU213735	Parentage SNP	OAR8	6522241	0	G	A	.	.	A/A	.	A/A	G/A	.	.	G/A	G/A	G/A	.	.	.	.	A/A	G/A	.	.	G/A	.	.	G/A	G/A	.	.	G/A	.	.	G/A	.	.	G/A	.	G/A	G/A	A/A	G/A	.	G/A	.	.	G/A
oar3_OAR8_6522306	DU213735_Neighbouring SNP	OAR8	6522306	65	A	T	.	.	T/T	.	T/T	A/T	.	.	A/T	A/T	A/T	.	.	A/T	.	T/T	A/T	.	.	A/T	T/T	.	A/T	A/T	.	A/T	A/T	.	A/T	A/T	.	.	A/T	A/T	A/T	A/T	T/T	A/T	.	A/T	.	.	A/T
oar3_OAR8_6522328	DU213735_Neighbouring SNP	OAR8	6522328	87	T	G	.	T/G	G/G	.	G/G	T/G	.	.	T/G	T/G	T/G	.	.	T/G	T/G	G/G	T/G	.	.	T/G	G/G	.	T/G	T/G	.	T/G	T/G	.	.	T/G	.	T/G	T/G	T/G	T/G	T/G	G/G	T/G	.	T/G	.	.	T/G
oar3_OAR8_13697960	DU411204_Neighbouring SNP	OAR8	13697960	-100	C	T	.	.	.	.	.	.	.	.	.	.	.	C/T	.	.	.	.	.	.	.	.	.	.	.	.	.	.	.	.	.	.	.	.	.	C/T	.	.	.	.	T/T	.	.	C/T	.
DU411204	Parentage SNP	OAR8	13698060	0	C	T	.	.	T/T	.	.	T/T	T/T	C/T	C/T	.	.	.	.	.	C/T	C/T	.	.	.	.	.	T/T	C/T	C/T	.	.	C/T	C/T	C/T	C/T	C/T	.	.	C/T	.	.	T/T	.	.	C/T	.	.	.
oar3_OAR8_13698156	DU411204_Neighbouring SNP	OAR8	13698156	96	G	A	.	.	.	.	.	.	.	.	G/A	.	G/A	.	.	.	G/A	G/A	.	.	.	.	.	.	.	.	.	.	G/A	.	.	G/A	G/A	.	.	G/A	.	.	A/A	.	.	G/A	.	.	.
oar3_OAR9_5580965	DU329154_Neighbouring SNP	OAR9	5580965	-61	G	T	.	.	G/T	.	.	.	.	.	.	.	.	.	.	.	.	G/T	G/T	.	.	G/T	T/T	.	.	.	.	.	.	.	.	.	G/T	.	.	G/T	.	.	.	.	.	.	.	.	.
DU329154	Parentage SNP	OAR9	5581026	0	A	G	G/G	G/G	A/G	G/G	.	.	A/G	.	G/G	A/G	A/G	A/G	A/G	A/G	G/G	.	.	.	.	A/G	.	A/G	G/G	.	.	G/G	.	.	G/G	.	A/G	G/G	A/G	A/G	.	G/G	.	.	G/G	G/G	.	.	G/G
oar3_OAR9_5581054	DU329154_Neighbouring SNP	OAR9	5581054	28	T	C	.	.	T/C	.	.	.	.	.	.	.	.	.	.	.	.	.	.	.	.	.	.	.	.	.	.	.	.	.	.	.	T/C	.	.	T/C	.	.	.	.	.	.	.	.	.
oar3_OAR9_86369233	DU189970_Neighbouring SNP	OAR9	86369233	-44	T	C	.	.	.	.	.	T/C	C/C	.	.	.	.	.	C/C	.	.	.	T/C	.	.	.	.	T/C	T/C	T/C	.	.	.	C/C	.	.	.	.	.	.	T/C	.	.	.	.	.	.	.	.
DU189970	Parentage SNP	OAR9	86369277	0	A	C	.	.	.	A/C	.	A/C	C/C	A/C	A/C	.	.	.	C/C	C/C	.	A/C	A/C	C/C	.	A/C	A/C	A/C	A/C	A/C	A/C	.	.	C/C	.	.	.	.	.	.	A/C	.	C/C	.	A/C	.	A/C	.	A/C
oar3_OAR9_86369312	DU189970_Neighbouring SNP	OAR9	86369312	35	T	C	.	.	.	.	.	T/C	C/C	.	.	.	.	.	.	.	.	.	.	.	.	.	.	.	T/C	.	.	.	.	.	.	.	.	.	.	.	.	.	.	.	.	.	.	.	.
oar3_OAR9_86369331	DU189970_Neighbouring SNP	OAR9	86369331	54	T	C	.	.	.	.	.	T/C	C/C	.	.	.	.	.	.	.	.	.	.	.	.	.	.	.	T/C	.	.	.	.	T/C	.	.	.	.	.	.	.	.	.	.	.	.	.	.	.
DU471913	Parentage SNP	OAR9	90950993	0	C	T	.	T/T	.	.	.	C/T	C/T	.	T/T	C/T	C/T	T/T	T/T	.	.	T/T	T/T	T/T	.	C/T	T/T	C/T	.	.	.	C/T	.	.	T/T	T/T	.	C/T	C/T	.	T/T	T/T	T/T	.	.	.	.	.	.
oar3_OAR9_90951020	DU471913_Neighbouring SNP	OAR9	90951020	27	T	C	.	.	.	.	.	.	.	.	.	.	.	.	.	.	.	.	.	.	.	.	.	.	.	.	.	.	.	.	.	.	.	.	.	.	.	.	.	.	.	.	.	.	.
DU364754	Parentage SNP	OAR9	93724659	0	A	G	A/G	.	.	.	.	G/G	G/G	G/G	A/G	A/G	G/G	G/G	G/G	G/G	A/G	G/G	G/G	A/G	G/G	.	.	.	G/G	.	.	.	A/G	G/G	A/G	G/G	G/G	A/G	G/G	G/G	G/G	G/G	G/G	G/G	.	A/G	.	.	A/G
oar3_OAR9_93724702	DU364754_Neighbouring SNP	OAR9	93724702	43	G	A	.	.	.	.	.	.	.	.	.	.	.	.	.	.	.	.	.	.	.	.	.	.	.	.	.	.	.	.	.	.	.	.	.	.	.	.	.	.	.	.	.	.	.
oar3_OAR9_93724726	DU364754_Neighbouring SNP	OAR9	93724726	67	G	A	G/A	A/A	A/A	A/A	A/A	.	.	.	G/A	G/A	.	.	.	.	G/A	.	.	.	.	A/A	A/A	A/A	.	G/A	.	A/A	G/A	.	G/A	.	.	G/A	.	.	.	.	.	.	A/A	G/A	A/A	.	.
oar3_OAR9_93724738	DU364754_Neighbouring SNP	OAR9	93724738	79	G	A	G/A	A/A	A/A	A/A	A/A	.	.	.	G/A	G/A	.	.	.	.	G/A	.	.	.	.	A/A	A/A	.	.	A/A	.	A/A	G/A	.	G/A	.	.	.	.	.	.	.	.	.	A/A	G/A	A/A	.	G/A
oar3_OAR9_94201662	DU372582_Neighbouring SNP	OAR9	94201662	-59	A	G	.	.	.	.	.	.	.	.	.	.	.	.	.	.	.	.	.	.	.	.	.	.	.	.	.	.	.	.	.	.	.	.	.	.	.	.	.	.	.	.	.	.	.
oar3_OAR9_94201687	DU372582_Neighbouring SNP	OAR9	94201687	-34	T	C	.	.	.	.	.	.	.	.	.	.	.	.	.	.	.	.	T/C	.	.	.	.	.	.	.	.	.	.	.	.	.	T/C	T/C	.	.	.	.	.	.	.	.	.	.	.
oar3_OAR9_94201707	DU372582_Neighbouring SNP	OAR9	94201707	-14	C	T	.	.	.	.	.	.	.	.	C/T	C/T	.	.	.	.	.	.	.	.	.	.	.	.	.	.	.	.	.	.	.	C/T	.	.	C/T	C/T	.	.	.	.	.	.	.	.	.
DU372582	Parentage SNP	OAR9	94201721	0	A	G	.	A/G	.	A/G	G/G	.	A/G	.	.	.	.	.	.	.	A/G	.	.	A/G	.	A/G	.	.	.	.	.	A/G	.	.	A/G	.	.	.	.	A/G	.	.	.	.	.	A/G	.	.	.
DU468275	Parentage SNP	OAR10	34896585	0	A	G	G/G	A/G	A/G	.	A/G	G/G	G/G	G/G	G/G	G/G	G/G	A/G	G/G	A/G	G/G	G/G	G/G	G/G	.	A/G	A/G	A/G	A/G	G/G	G/G	G/G	.	.	A/G	G/G	.	G/G	G/G	G/G	A/G	.	G/G	G/G	G/G	G/G	G/G	.	G/G
oar3_OAR10_39999540	DU310747_Neighbouring SNP	OAR10	39999540	-52	T	G	T/G	.	T/G	T/G	.	.	.	.	.	.	.	.	.	.	.	.	.	.	.	.	.	.	T/G	T/G	.	.	.	G/G	.	.	.	T/G	.	.	.	.	T/G	.	T/G	.	T/G	T/G	.
DU310747	Parentag_Neighbouring SNP	OAR10	39999592	0	G	A	G/A	A/A	G/A	G/A	.	A/A	A/A	.	A/A	.	G/A	A/A	.	G/A	G/A	G/A	A/A	A/A	G/A	A/A	.	A/A	G/A	G/A	.	.	.	.	A/A	A/A	G/A	.	A/A	G/A	A/A	.	.	A/A	.	A/A	G/A	.	.
oar3_OAR10_39999657	DU310747_Neighbouring SNP	OAR10	39999657	65	G	T	.	.	.	.	.	.	.	.	.	.	.	.	.	.	.	.	.	.	.	.	.	.	.	.	.	.	.	.	.	.	.	.	.	.	.	.	.	.	.	.	.	.	.
oar3_OAR10_85580408	DU434120_Neighbouring SNP	OAR10	85580408	-33	G	C	.	.	G/C	.	.	G/C	.	.	.	.	.	G/C	.	.	.	.	.	.	.	.	.	.	.	.	.	.	.	.	.	.	.	G/C	.	.	.	.	.	.	.	.	.	.	.
DU434120	Parentage SNP	OAR10	85580441	0	T	C	C/C	.	C/C	.	.	T/C	.	C/C	C/C	.	.	T/C	T/C	C/C	C/C	C/C	C/C	C/C	T/C	.	C/C	C/C	T/C	T/C	.	T/C	.	.	.	.	C/C	C/C	C/C	C/C	T/C	T/C	.	T/C	T/C	.	T/C	T/C	T/C
oar3_OAR10_85580473	DU434120_Neighbouring SNP	OAR10	85580473	32	A	G	.	A/G	.	.	G/G	A/G	A/G	.	.	G/G	.	A/G	.	.	.	.	.	.	.	G/G	.	.	A/G	.	.	A/G	G/G	G/G	G/G	G/G	.	.	.	.	A/G	A/G	.	A/G	A/G	A/G	A/G	.	A/G
oar3_OAR10_85580510	DU434120_Neighbouring SNP	OAR10	85580510	69	T	G	.	.	T/G	.	.	.	.	T/G	.	.	.	.	.	T/G	.	.	.	G/G	.	.	.	.	.	.	.	.	.	.	.	.	.	.	T/G	T/G	.	.	.	.	T/G	.	.	.	.
oar3_OAR11_1925887	DU269694_Neighbouring SNP	OAR11	1925887	-68	A	C	.	A/C	.	.	.	.	.	.	.	.	.	.	.	.	.	.	.	A/C	.	.	.	.	.	.	.	.	A/C	.	.	.	.	.	.	.	.	.	.	.	.	.	.	.	A/C
oar3_OAR11_1925910	DU269694_Neighbouring SNP	OAR11	1925910	-45	T	C	.	.	.	.	.	.	.	.	.	.	.	T/C	.	.	.	.	.	.	.	.	.	T/C	.	.	.	.	.	.	.	.	.	.	.	C/C	.	.	.	.	.	.	.	.	.
oar3_OAR11_1925948	DU269694_Neighbouring SNP	OAR11	1925948	-7	A	G	.	G/G	A/G	.	G/G	A/G	G/G	G/G	A/G	A/G	A/G	A/G	A/G	.	A/G	G/G	.	A/G	A/G	.	.	A/G	G/G	A/G	A/G	G/G	.	G/G	.	.	A/G	.	A/G	A/G	G/G	A/G	G/G	A/G	.	A/G	A/G	.	A/G
oar3_OAR11_1925953	DU269694_Neighbouring SNP	OAR11	1925953	-2	G	C	.	.	.	.	C/C	G/C	C/C	.	.	G/C	.	.	G/C	.	.	.	.	.	.	.	.	.	.	.	G/C	.	.	G/C	.	.	.	.	.	.	.	.	.	.	.	.	.	.	.
DU269694	Parentage SNP	OAR11	1925955	0	T	C	.	C/C	T/C	.	C/C	T/C	C/C	C/C	T/C	T/C	T/C	T/C	T/C	.	T/C	C/C	.	T/C	.	.	.	T/C	C/C	T/C	T/C	C/C	.	C/C	.	.	T/C	.	T/C	T/C	C/C	T/C	C/C	T/C	.	T/C	T/C	.	T/C
oar3_OAR11_1925997	DU269694_Neighbouring SNP	OAR11	1925997	42	G	A	.	.	.	.	.	.	.	.	.	.	.	.	.	.	.	.	.	.	.	.	.	.	.	.	.	.	.	.	.	.	.	.	.	.	.	.	.	.	.	.	.	.	.
oar3_OAR11_1926042	DU269694_Neighbouring SNP	OAR11	1926042	87	G	A	.	.	.	.	.	.	.	.	.	.	.	.	.	.	.	.	.	.	.	.	.	.	.	.	.	.	.	.	.	.	.	.	.	.	.	.	.	.	.	.	.	.	.
oar3_OAR11_1926049	DU269694_Neighbouring SNP	OAR11	1926049	94	A	G	.	.	.	.	.	.	.	.	.	.	A/G	.	.	.	.	A/G	.	.	.	.	.	.	G/G	A/G	.	.	.	.	.	.	.	.	.	.	.	.	.	A/G	A/G	G/G	A/G	A/G	.
	_Neighbouring SNP
oar3_OAR11_15503038	DU433863_Neighbouring SNP	OAR11	15503038	-100	T	C	.	.	C/C	T/C	C/C	.	T/C	C/C	T/C	C/C	.	C/C	T/C	C/C	C/C	.	T/C	T/C	.	.	C/C	C/C	.	.	.	C/C	C/C	.	T/C	.	C/C	C/C	C/C	.	C/C	T/C	T/C	C/C	T/C	T/C	C/C	.	T/C
oar3_OAR11_15503087	DU433863_Neighbouring SNP	OAR11	15503087	-51	G	C	.	.	.	.	.	.	.	.	.	.	.	.	.	.	.	.	.	.	.	.	.	.	.	.	.	.	.	.	.	.	.	.	.	.	.	.	.	.	.	.	.	.	.
oar3_OAR11_15503090	DU433863_Neighbouring SNP	OAR11	15503090	-48	T	G	.	.	.	.	.	.	.	.	.	.	.	.	.	.	.	.	.	.	.	.	.	.	.	.	.	.	.	.	.	.	.	.	.	.	.	.	.	.	.	.	.	.	.
DU433863	Parentage SNP	OAR11	15503138	0	T	C	.	.	C/C	T/C	C/C	.	.	C/C	T/C	C/C	.	C/C	T/C	C/C	C/C	.	T/C	T/C	C/C	T/C	C/C	C/C	.	.	.	C/C	C/C	.	T/C	.	.	C/C	C/C	.	C/C	T/C	T/C	C/C	T/C	T/C	C/C	.	T/C
oar3_OAR11_15503170	DU433863_Neighbouring SNP	OAR11	15503170	32	T	C	.	.	.	.	.	.	.	.	.	.	.	.	.	.	.	.	.	.	.	.	.	.	.	.	.	.	.	.	.	.	.	.	.	.	.	.	.	.	.	.	.	.	.
DU417675	Parentage SNP	OAR11	19595571	0	T	C	T/C	.	C/C	T/C	T/C	C/C	C/C	.	C/C	T/C	T/C	T/C	T/C	T/C	C/C	C/C	.	.	C/C	C/C	T/C	T/C	C/C	C/C	C/C	T/C	C/C	C/C	T/C	.	T/C	C/C	C/C	C/C	C/C	.	C/C	C/C	T/C	T/C	C/C	T/C	T/C
oar3_OAR11_19595650	DU417675_Neighbouring SNP	OAR11	19595650	79	G	A	.	.	.	.	.	.	.	.	.	.	.	.	.	.	.	.	G/A	.	.	A/A	.	.	.	.	.	.	G/A	.	G/A	.	G/A	.	.	.	.	.	G/A	A/A	.	.	G/A	.	.
oar3_OAR11_25329663	DU508448_Neighbouring SNP	OAR11	25329663	-4	C	T	.	.	.	.	.	.	.	.	.	.	.	.	.	.	.	.	.	.	.	.	.	.	.	.	.	.	.	.	.	.	.	.	.	.	.	.	C/T	.	.	.	.	.	.
DU508448	Parentage SNP	OAR11	25329667	0	C	T	C/T	C/T	T/T	T/T	C/T	C/T	C/T	T/T	.	C/T	T/T	.	T/T	.	C/T	T/T	C/T	T/T	T/T	C/T	.	.	T/T	T/T	.	.	.	.	C/T	C/T	C/T	T/T	C/T	C/T	.	.	.	.	.	T/T	T/T	T/T	.
oar3_OAR11_25329701	DU508448_Neighbouring SNP	OAR11	25329701	34	G	A	.	.	.	.	.	G/A	.	.	.	.	.	.	.	.	.	.	.	.	.	.	.	.	.	.	.	.	.	.	.	.	.	.	.	.	.	.	.	.	.	.	.	.	.
oar3_OAR11_59195767	DU326572_Neighbouring SNP	OAR11	59195767	-15	T	G	.	.	T/G	.	T/G	G/G	.	.	.	.	.	.	.	.	T/G	.	.	T/G	.	.	.	.	.	.	.	T/G	.	.	.	.	.	.	.	.	.	.	.	.	.	.	.	.	.
DU326572	Parentage SNP	OAR11	59195782	0	T	C	T/C	C/C	.	C/C	T/C	.	T/C	C/C	C/C	T/C	T/C	T/C	C/C	.	T/C	T/C	T/C	.	T/C	T/C	T/C	C/C	C/C	C/C	.	T/C	T/C	.	T/C	T/C	.	.	T/C	T/C	C/C	C/C	C/C	C/C	C/C	C/C	T/C	.	T/C
oar3_OAR11_59195814	DU326572_Neighbouring SNP	OAR11	59195814	32	C	T	.	.	C/T	.	C/T	T/T	.	.	.	.	.	.	.	C/T	C/T	.	.	C/T	.	.	.	.	.	.	.	C/T	.	.	.	.	.	.	.	.	.	.	.	.	.	.	.	.	C/T
oar3_OAR11_59195857	DU326572_Neighbouring SNP	OAR11	59195857	75	G	T	T/T	T/T	.	T/T	G/T	.	G/T	.	T/T	G/T	T/T	G/T	T/T	G/T	G/T	.	G/T	.	G/T	.	G/T	T/T	T/T	T/T	.	G/T	G/T	.	.	.	.	G/T	T/T	G/T	T/T	T/T	T/T	T/T	T/T	T/T	G/T	.	G/T
oar3_OAR11_59195867	DU326572_Neighbouring SNP	OAR11	59195867	85	A	C	.	.	.	.	.	.	.	.	.	.	.	.	.	.	.	.	.	.	.	.	.	.	.	.	.	.	.	.	.	.	.	.	.	.	.	.	.	.	.	.	.	.	.
oar3_OAR12_27048127	DU314655_Neighbouring SNP	OAR12	27048127	-76	T	C	.	.	.	.	.	.	.	.	.	.	.	.	.	.	.	.	.	.	.	.	.	.	.	.	.	.	.	.	.	.	.	.	.	.	.	.	.	.	.	.	.	.	.
oar3_OAR12_27048128	DU314655_Neighbouring SNP	OAR12	27048128	-75	G	A	G/A	G/A	.	.	A/A	A/A	.	A/A	G/A	.	G/A	.	.	.	.	G/A	.	.	G/A	.	.	.	G/A	G/A	.	G/A	.	G/A	.	.	.	G/A	.	A/A	.	G/A	.	.	.	.	.	.	.
oar3_OAR12_27048147	DU314655_Neighbouring SNP	OAR12	27048147	-56	T	A	T/A	T/A	.	.	A/A	A/A	.	A/A	T/A	.	T/A	.	.	.	.	T/A	.	.	T/A	.	.	.	T/A	T/A	.	.	.	T/A	.	.	.	T/A	.	A/A	.	T/A	.	.	.	.	.	T/A	.
oar3_OAR12_27048165	DU314655_Neighbouring SNP	OAR12	27048165	-38	G	A	.	.	.	A/A	.	.	.	.	.	.	.	A/A	G/A	G/A	G/A	G/A	G/A	.	.	.	.	.	.	G/A	.	G/A	.	G/A	.	G/A	G/A	.	.	.	.	.	.	A/A	.	.	.	.	.
DU314655	Parentage SNP	OAR12	27048203	0	C	T	C/T	C/T	.	T/T	T/T	T/T	.	T/T	C/T	.	.	T/T	C/T	C/T	C/T	T/T	C/T	.	C/T	.	.	.	C/T	T/T	.	T/T	.	T/T	.	.	.	C/T	.	T/T	.	C/T	.	T/T	.	.	.	C/T	.
oar3_OAR12_27048206	DU314655_Neighbouring SNP	OAR12	27048206	3	C	G	.	.	.	.	.	.	.	.	.	.	.	.	.	.	.	.	.	.	.	.	.	.	.	.	.	.	.	.	.	.	.	.	.	.	.	.	.	.	.	.	.	.	.
oar3_OAR12_27048212	DU314655_Neighbouring SNP	OAR12	27048212	9	C	T	.	.	.	.	.	.	.	.	.	.	.	.	.	.	.	.	.	.	.	.	.	.	.	.	.	.	.	.	.	.	.	.	.	.	.	.	.	.	.	.	.	.	.
oar3_OAR12_27048237	DU314655_Neighbouring SNP	OAR12	27048237	34	G	T	.	.	.	.	.	.	.	.	.	G/T	.	.	.	.	.	.	G/T	G/T	.	.	.	.	.	.	.	.	.	.	.	.	.	.	.	.	.	.	.	.	.	.	.	.	.
oar3_OAR12_27048248	DU314655_Neighbouring SNP	OAR12	27048248	45	G	A	.	.	.	G/A	.	.	.	.	.	.	.	.	.	G/A	.	.	G/A	.	.	.	.	.	.	.	.	.	.	G/A	.	.	G/A	.	.	.	.	.	.	.	.	.	.	.	.
	DU310703_Neighbouring SNP	OAR12	75121257	-75	G	A	.	.	.	.	.	.	.	.	.	.	.	.	.	.	.	.	.	.	.	.	.	.	.	.	.	.	.	.	.	.	G/A	.	.	.	.	.	.	.	.	.	.	.	.
oar3_OAR12_75121264	DU310703_Neighbouring SNP	OAR12	75121264	-68	A	G	.	.	.	.	.	.	A/G	.	.	.	A/G	.	A/G	A/G	.	.	.	.	.	.	.	.	.	.	.	.	.	G/G	.	.	A/G	.	G/G	.	A/G	.	.	.	G/G	.	.	.	.
oar3_OAR12_75121285	DU310703_Neighbouring SNP	OAR12	75121285	-47	G	A	.	.	.	.	.	.	.	.	.	.	.	.	.	.	.	.	.	.	.	.	.	.	.	.	.	.	.	.	.	.	G/A	.	.	.	.	.	.	.	.	.	.	.	.
DU310703	Parentage SNP	OAR12	75121332	0	C	T	.	.	T/T	C/T	.	C/T	C/T	C/T	.	.	T/T	T/T	T/T	C/T	T/T	.	C/T	C/T	.	.	T/T	T/T	.	.	.	C/T	.	T/T	.	.	C/T	C/T	T/T	.	T/T	.	.	.	T/T	T/T	.	.	.
oar3_OAR12_75121403	DU310703_Neighbouring SNP	OAR12	75121403	71	G	A	.	.	.	.	.	.	G/A	.	.	G/A	.	.	.	G/A	.	G/A	.	.	.	.	.	.	G/A	.	.	.	.	.	A/A	G/A	.	.	.	.	.	A/A	.	G/A	.	.	.	.	.
oar3_OAR12_75121413	DU310703_Neighbouring SNP	OAR12	75121413	81	C	T	T/T	C/T	T/T	T/T	T/T	T/T	T/T	C/T	C/T	T/T	T/T	T/T	T/T	T/T	T/T	T/T	.	.	T/T	T/T	T/T	T/T	T/T	T/T	.	T/T	.	T/T	T/T	T/T	C/T	T/T	T/T	C/T	T/T	T/T	.	T/T	T/T	T/T	.	.	T/T
oar3_OAR13_10965955	DU275428_Neighbouring SNP	OAR13	10965955	-97	G	T	G/T	G/T	.	T/T	.	G/T	T/T	.	T/T	G/T	G/T	.	.	.	T/T	G/T	G/T	G/T	.	G/T	G/T	T/T	T/T	.	G/T	G/T	T/T	.	T/T	.	T/T	G/T	G/T	G/T	.	G/T	G/T	G/T	.	.	.	.	T/T
oar3_OAR13_10966036	DU275428_Neighbouring SNP	OAR13	10966036	-16	G	C	.	.	.	G/C	.	G/C	C/C	.	G/C	G/C	.	.	.	.	C/C	.	G/C	.	.	.	.	C/C	C/C	.	G/C	G/C	C/C	.	C/C	.	.	G/C	G/C	G/C	.	G/C	G/C	G/C	.	C/C	.	G/C	C/C
oar3_OAR13_10966046	DU275428_Neighbouring SNP	OAR13	10966046	-6	A	C	A/C	.	.	.	.	A/C	.	.	.	.	.	.	.	.	.	.	.	.	.	.	.	.	.	.	.	.	.	A/C	.	.	.	.	.	.	.	.	.	.	.	.	.	.	.
DU275428	Parentage SNP	OAR13	10966052	0	C	T	.	.	.	C/T	.	C/T	T/T	.	C/T	C/T	.	.	.	.	T/T	.	C/T	C/T	.	C/T	.	T/T	T/T	.	C/T	.	T/T	.	T/T	.	.	C/T	.	C/T	.	C/T	C/T	C/T	.	T/T	.	C/T	T/T
oar3_OAR13_10966077	DU275428_Neighbouring SNP	OAR13	10966077	25	G	A	.	.	.	.	.	.	.	.	.	.	.	.	.	.	.	.	.	.	.	.	.	.	.	.	.	.	.	.	.	.	.	.	.	.	.	.	.	.	.	.	.	.	.
oar3_OAR13_10966094	DU275428_Neighbouring SNP	OAR13	10966094	42	G	A	.	.	.	.	.	.	.	.	.	.	.	.	.	.	.	.	.	.	.	.	.	.	.	.	.	.	.	.	.	.	.	.	.	.	.	.	.	.	.	.	.	.	.
oar3_OAR13_10966121	DU275428_Neighbouring SNP	OAR13	10966121	69	C	T	.	.	.	.	.	.	.	.	.	.	.	.	.	.	.	.	.	.	.	.	.	.	.	.	.	.	.	.	.	.	.	.	.	.	.	.	.	.	.	.	.	.	.
oar3_OAR13_10966149	DU275428_Neighbouring SNP	OAR13	10966149	97	G	T	.	.	.	.	.	.	.	.	.	.	.	.	.	.	.	.	.	.	.	.	.	.	.	.	.	.	.	.	.	.	.	.	.	.	.	.	.	.	.	.	.	.	.
oar3_OAR13_10966152	DU275428_Neighbouring SNP	OAR13	10966152	100	A	G	.	.	.	.	.	A/G	G/G	.	A/G	A/G	.	.	.	.	.	A/G	A/G	.	A/G	A/G	.	G/G	G/G	.	.	.	G/G	.	G/G	.	.	A/G	A/G	A/G	.	A/G	.	A/G	.	G/G	.	A/G	G/G
oar3_OAR13_30047869	DU435573_Neighbouring SNP	OAR13	30047869	-52	A	G	.	A/G	.	.	.	.	.	.	.	.	.	.	.	.	.	.	.	.	.	.	.	.	.	.	.	.	.	.	.	.	.	.	.	.	.	.	.	.	.	.	A/G	.	.
oar3_OAR13_30047890	DU435573_Neighbouring SNP	OAR13	30047890	-31	G	A	.	G/A	.	.	.	.	.	.	.	.	.	.	.	.	.	.	.	.	.	.	.	.	.	.	.	.	.	.	.	.	.	.	.	.	.	.	.	.	.	.	G/A	.	.
DU435573	Parentag_Neighbouring SNP	OAR13	30047921	0	G	A	.	G/A	A/A	A/A	G/A	.	G/A	.	G/A	G/A	A/A	G/A	.	.	A/A	A/A	A/A	A/A	G/A	A/A	.	A/A	G/A	A/A	.	G/A	G/A	.	G/A	.	A/A	G/A	A/A	G/A	A/A	A/A	A/A	.	G/A	A/A	.	A/A	G/A
oar3_OAR13_30047960	DU435573_Neighbouring SNP	OAR13	30047960	39	A	G	.	.	G/G	G/G	A/G	.	.	.	.	.	A/G	A/G	.	.	.	A/G	A/G	.	.	A/G	.	A/G	.	G/G	.	.	A/G	.	.	.	A/G	.	.	.	A/G	.	.	.	.	G/G	.	.	.
oar3_OAR13_41314299	DU411403_Neighbouring SNP	OAR13	41314299	-90	T	C	.	.	C/C	C/C	C/C	.	T/C	.	.	.	.	T/C	C/C	T/C	T/C	T/C	.	T/C	T/C	C/C	.	.	.	C/C	.	.	T/C	T/C	T/C	T/C	C/C	C/C	T/C	T/C	C/C	.	.	C/C	.	.	.	C/C	T/C
oar3_OAR13_41314322	DU411403_Neighbouring SNP	OAR13	41314322	-67	G	A	G/A	.	G/A	.	A/A	.	.	.	.	.	.	.	A/A	G/A	G/A	.	.	.	G/A	G/A	.	.	.	G/A	.	.	G/A	G/A	G/A	.	.	G/A	G/A	.	.	.	.	G/A	.	.	.	.	G/A
oar3_OAR13_41314369	DU411403_Neighbouring SNP	OAR13	41314369	-20	G	A	G/A	.	G/A	.	A/A	.	.	.	.	.	.	.	A/A	G/A	G/A	.	G/A	.	G/A	G/A	.	.	.	G/A	.	.	G/A	G/A	G/A	.	.	G/A	G/A	G/A	.	.	.	G/A	.	.	.	.	G/A
DU411403	Parentage SNP	OAR13	41314389	0	T	C	T/C	.	C/C	C/C	C/C	.	T/C	.	.	.	.	T/C	C/C	T/C	T/C	.	T/C	T/C	.	C/C	.	.	.	C/C	.	.	T/C	T/C	T/C	T/C	C/C	C/C	T/C	.	C/C	.	.	C/C	.	.	.	C/C	T/C
oar3_OAR13_41314431	DU411403_Neighbouring SNP	OAR13	41314431	42	G	T	G/T	.	.	.	T/T	.	.	.	.	.	.	.	T/T	G/T	G/T	.	.	.	.	G/T	.	.	.	G/T	.	.	G/T	G/T	.	.	.	G/T	.	G/T	.	.	.	G/T	.	.	.	.	G/T
oar3_OAR13_41314482	DU411403_Neighbouring SNP	OAR13	41314482	93	G	C	.	.	G/C	C/C	.	.	G/C	.	.	.	.	.	.	.	.	.	.	G/C	.	G/C	.	.	.	G/C	.	.	.	.	.	G/C	C/C	G/C	.	.	C/C	.	.	.	.	.	.	.	.
oar3_OAR14_44825684	DU462008_Neighbouring SNP	OAR14	44825684	-29	G	A	A/A	.	A/A	G/A	A/A	.	A/A	.	G/A	A/A	G/A	G/A	G/A	.	A/A	A/A	A/A	G/A	.	A/A	G/A	A/A	G/A	A/A	G/A	A/A	.	.	.	A/A	.	A/A	G/A	.	.	A/A	.	A/A	A/A	G/A	A/A	.	.
oar3_OAR14_44825690	DU462008_Neighbouring SNP	OAR14	44825690	-23	G	A	A/A	.	G/A	.	.	.	G/A	.	.	G/A	G/A	.	G/A	.	.	A/A	A/A	.	.	A/A	G/A	G/A	.	A/A	A/A	.	.	A/A	.	A/A	.	A/A	.	.	.	A/A	.	.	.	.	A/A	.	.
DU462008	Parentage SNP	OAR14	44825713	0	C	A	A/A	.	C/A	.	.	.	C/A	.	.	C/A	C/A	.	C/A	.	.	A/A	A/A	.	.	A/A	C/A	C/A	.	A/A	A/A	.	.	A/A	.	A/A	.	A/A	.	.	.	A/A	.	.	.	.	A/A	.	.
oar3_OAR14_57922441	DU223894_Neighbouring SNP	OAR14	57922441	-94	T	C	.	.	T/C	T/C	.	.	.	T/C	C/C	.	.	.	.	.	.	C/C	.	C/C	.	T/C	.	T/C	T/C	.	.	.	C/C	.	C/C	C/C	.	T/C	.	.	.	T/C	.	T/C	T/C	C/C	.	.	T/C
DU223894	Parentage SNP	OAR14	57922535	0	T	C	T/C	.	T/C	T/C	.	.	.	T/C	C/C	.	T/C	.	.	.	.	C/C	.	C/C	.	T/C	.	T/C	T/C	.	.	.	C/C	.	C/C	C/C	.	T/C	.	.	.	T/C	.	C/C	T/C	C/C	.	.	T/C
oar3_OAR14_57922614	DU223894_Neighbouring SNP	OAR14	57922614	79	C	T	.	.	.	.	.	.	.	.	.	.	.	.	.	.	.	.	.	.	.	.	.	.	.	.	.	.	.	.	.	.	.	.	.	.	.	.	.	.	.	.	.	.	.
oar3_OAR14_61164366	DU381045_Neighbouring SNP	OAR14	61164366	-92	G	A	G/A	G/A	.	G/A	.	.	A/A	G/A	.	.	G/A	.	G/A	G/A	.	G/A	.	.	.	G/A	A/A	G/A	.	G/A	.	.	.	.	A/A	.	.	G/A	.	G/A	G/A	.	G/A	G/A	A/A	G/A	.	G/A	.
oar3_OAR14_61164423	DU381045_Neighbouring SNP	OAR14	61164423	-35	C	T	.	.	.	C/T	.	.	.	.	.	.	.	.	.	.	.	.	.	.	.	C/T	.	.	.	.	.	.	.	.	.	.	.	C/T	.	.	.	C/T	.	.	.	C/T	.	.	.
DU381045	Parentage SNP	OAR14	61164458	0	C	T	C/T	.	T/T	.	T/T	T/T	.	.	T/T	C/T	.	T/T	C/T	.	T/T	.	.	.	.	C/T	.	.	T/T	C/T	T/T	.	C/T	.	C/T	.	T/T	.	.	C/T	C/T	C/T	C/T	C/T	.	C/T	C/T	.	.
oar3_OAR14_61164498	DU381045_Neighbouring SNP	OAR14	61164498	40	G	A	.	.	.	.	.	.	.	.	.	.	.	.	.	.	.	.	.	.	.	.	.	G/A	.	.	.	.	.	.	.	.	.	.	.	.	.	.	.	.	G/A	.	.	.	.
oar3_OAR14_61164501	DU381045_Neighbouring SNP	OAR14	61164501	43	A	G	.	.	.	.	.	.	.	.	.	.	.	.	.	.	.	.	.	.	.	.	.	.	.	.	.	.	.	.	.	.	.	.	.	.	.	.	.	.	.	.	.	.	.
oar3_OAR14_61164533	DU381045_Neighbouring SNP	OAR14	61164533	75	G	A	.	G/A	.	G/A	.	.	.	.	.	.	.	.	.	.	.	.	G/A	.	G/A	G/A	.	G/A	.	.	.	.	.	G/A	.	.	.	.	.	.	.	.	.	.	G/A	G/A	.	.	.
oar3_OAR15_2412031	DU464373_Neighbouring SNP	OAR15	2412031	-90	A	G	A/G	A/G	A/G	.	.	G/G	A/G	A/G	A/G	G/G	.	A/G	.	G/G	G/G	G/G	.	G/G	.	.	.	.	A/G	.	.	A/G	A/G	.	A/G	A/G	.	G/G	G/G	A/G	G/G	A/G	A/G	.	.	.	.	A/G	.
oar3_OAR15_2412061	DU464373_Neighbouring SNP	OAR15	2412061	-60	T	A	.	.	.	.	.	.	.	.	.	.	.	.	.	.	.	.	.	.	.	.	.	.	.	.	.	.	.	.	.	.	.	.	.	.	.	.	.	.	.	.	.	.	.
oar3_OAR15_2412087	DU464373_Neighbouring SNP	OAR15	2412087	-34	T	C	.	.	.	.	.	.	.	.	.	.	.	.	.	.	.	.	.	.	.	.	.	.	.	.	.	.	.	.	.	.	.	.	.	.	.	.	.	.	.	.	.	.	.
DU464373	Parentage SNP	OAR15	2412121	0	T	C	T/C	T/C	T/C	T/C	C/C	.	T/C	T/C	.	.	C/C	T/C	C/C	.	.	.	C/C	.	.	C/C	C/C	.	.	C/C	.	T/C	T/C	T/C	T/C	T/C	C/C	.	.	T/C	.	T/C	T/C	C/C	C/C	.	C/C	.	C/C
oar3_OAR15_2412127	DU464373_Neighbouring SNP	OAR15	2412127	6	G	A	.	.	.	.	.	.	.	.	.	.	.	.	.	.	.	.	.	.	.	.	.	.	.	.	.	.	.	.	.	.	.	.	.	.	.	.	.	.	.	.	.	.	.
oar3_OAR15_2412195	DU464373_Neighbouring SNP	OAR15	2412195	74	G	A	.	.	.	.	.	.	.	.	.	.	.	.	.	.	.	.	.	.	.	.	.	.	.	.	.	.	.	.	.	.	.	.	.	.	.	.	.	.	.	.	.	.	.
oar3_OAR15_2412203	DU464373_Neighbouring SNP	OAR15	2412203	82	A	C	.	.	.	.	.	.	.	.	.	.	.	.	.	.	.	.	.	.	.	.	.	.	.	.	.	.	.	.	.	.	.	.	.	.	.	.	.	.	.	.	.	.	.
oar3_OAR15_44118938	DU426312_Neighbouring SNP	OAR15	44118938	-88	G	T	.	.	.	.	.	.	.	.	.	.	.	.	.	.	.	.	.	.	.	.	.	.	.	.	.	.	.	.	.	.	.	.	.	.	.	.	.	.	.	.	.	.	.
oar3_OAR15_44118947	DU426312_Neighbouring SNP	OAR15	44118947	-79	T	C	T/C	T/C	C/C	T/C	T/C	C/C	C/C	.	C/C	T/C	C/C	C/C	C/C	C/C	C/C	C/C	C/C	C/C	T/C	C/C	.	C/C	C/C	C/C	.	.	C/C	C/C	C/C	C/C	C/C	C/C	C/C	C/C	C/C	.	T/C	C/C	T/C	C/C	T/C	C/C	C/C
oar3_OAR15_44119018	DU426312_Neighbouring SNP	OAR15	44119018	-8	C	T	.	.	.	.	.	.	.	.	.	.	.	.	C/T	.	C/T	.	.	.	.	.	.	.	.	.	.	.	.	.	.	C/T	C/T	C/T	.	C/T	.	.	.	.	.	.	.	.	C/T
DU426312	Parentage SNP	OAR15	44119026	0	T	C	T/C	.	.	C/C	T/C	.	.	.	.	T/C	.	.	.	.	.	.	.	.	T/C	.	T/C	.	.	T/C	C/C	C/C	.	.	.	.	.	.	.	.	.	C/C	T/C	.	C/C	.	T/C	.	.
oar3_OAR15_44119109	DU426312_Neighbouring SNP	OAR15	44119109	83	T	C	.	.	.	.	.	T/C	.	.	T/C	.	.	.	.	T/C	.	.	.	T/C	.	.	.	.	C/C	.	.	.	.	.	T/C	.	.	T/C	T/C	.	T/C	.	.	T/C	.	.	.	T/C	.
oar3_OAR15_73444666	DU301502_Neighbouring SNP	OAR15	73444666	-47	C	A	.	.	A/A	A/A	C/A	A/A	A/A	A/A	C/A	A/A	A/A	C/A	.	A/A	C/A	.	.	.	C/A	C/A	A/A	C/A	A/A	A/A	A/A	C/A	C/A	A/A	A/A	.	C/A	A/A	C/A	.	C/A	A/A	.	C/A	.	C/A	A/A	C/A	C/A
oar3_OAR15_73444671	DU301502_Neighbouring SNP	OAR15	73444671	-42	G	T	.	.	.	.	.	.	.	.	.	.	.	.	.	.	.	.	.	.	.	.	.	.	.	.	.	.	.	.	.	.	.	.	.	.	.	.	.	.	.	.	.	.	.
DU301502	Parentage SNP	OAR15	73444713	0	G	A	.	.	A/A	A/A	G/A	A/A	A/A	A/A	G/A	A/A	A/A	G/A	.	A/A	.	.	.	.	G/A	G/A	A/A	.	A/A	.	A/A	G/A	G/A	.	A/A	.	G/A	A/A	G/A	.	G/A	A/A	.	G/A	.	G/A	A/A	G/A	G/A
DU241306	Parentage SNP	OAR15	78319869	0	T	C	.	T/C	.	.	.	.	.	.	.	.	T/C	T/C	T/C	T/C	C/C	T/C	.	C/C	C/C	.	.	T/C	T/C	.	T/C	T/C	.	T/C	C/C	.	.	.	T/C	.	T/C	T/C	.	.	.	T/C	.	.	T/C
oar3_OAR15_78319917	DU241306_Neighbouring SNP	OAR15	78319917	48	C	T	.	.	.	.	.	.	.	.	.	.	.	C/T	.	.	.	.	.	.	.	.	.	.	C/T	.	.	.	.	.	.	.	.	.	C/T	.	.	.	.	.	.	C/T	.	.	.
oar3_OAR15_78319935	DU241306_Neighbouring SNP	OAR15	78319935	66	A	T	.	.	.	.	.	.	.	.	.	.	.	.	.	.	.	.	.	.	.	.	.	.	.	.	.	.	.	.	.	.	.	.	.	.	.	.	.	.	.	.	.	.	.
oar3_OAR17_10169167	DU324670_Neighbouring SNP	OAR17	10169167	-59	C	T	T/T	T/T	T/T	T/T	C/T	C/T	T/T	T/T	T/T	T/T	C/T	T/T	T/T	.	T/T	T/T	T/T	T/T	T/T	C/T	T/T	.	T/T	T/T	.	C/T	C/T	C/T	T/T	T/T	C/T	T/T	T/T	C/T	.	T/T	T/T	T/T	T/T	C/T	T/T	T/T	T/T
DU324670	Parentage SNP	OAR17	10169226	0	G	A	.	.	A/A	G/A	G/A	.	G/A	A/A	G/A	G/A	G/A	G/A	A/A	.	.	A/A	A/A	A/A	A/A	.	A/A	.	.	G/A	G/A	G/A	.	.	.	.	A/A	.	.	.	.	.	G/A	A/A	A/A	G/A	.	A/A	.
oar3_OAR17_10169279	DU324670_Neighbouring SNP	OAR17	10169279	53	A	G	G/G	G/G	G/G	G/G	A/G	A/G	G/G	G/G	G/G	G/G	A/G	G/G	G/G	.	G/G	G/G	G/G	G/G	G/G	A/G	G/G	G/G	G/G	G/G	G/G	A/G	.	A/G	G/G	G/G	G/G	G/G	G/G	A/G	G/G	G/G	G/G	G/G	G/G	A/G	G/G	G/G	G/G
oar3_OAR17_14335835	DU206327_Neighbouring SNP	OAR17	14335835	-59	T	C	.	.	.	.	.	.	.	.	.	.	.	.	.	.	.	.	.	.	.	.	.	.	.	.	.	.	.	.	.	.	.	.	.	.	.	.	.	.	.	.	.	.	.
oar3_OAR17_14335842	DU206327_Neighbouring SNP	OAR17	14335842	-52	C	T	T/T	.	T/T	.	T/T	.	.	C/T	C/T	C/T	.	T/T	C/T	T/T	.	C/T	C/T	.	C/T	T/T	T/T	T/T	.	.	C/T	T/T	T/T	.	.	.	.	C/T	.	C/T	T/T	C/T	C/T	C/T	T/T	C/T	C/T	.	T/T
oar3_OAR17_14335852	DU206327_Neighbouring SNP	OAR17	14335852	-42	T	C	.	.	.	.	.	.	.	.	.	.	.	.	.	.	.	.	.	.	.	.	.	.	.	.	.	.	.	.	.	.	.	.	.	.	.	.	.	.	.	.	.	.	.
oar3_OAR17_14335863	DU206327_Neighbouring SNP	OAR17	14335863	-31	T	C	.	.	.	.	.	.	.	.	.	.	.	.	.	.	.	.	.	.	.	.	.	.	.	.	.	.	.	.	.	.	.	.	.	.	.	.	.	.	.	.	.	.	.
DU206327	Parentage SNP	OAR17	14335894	0	C	T	.	.	.	C/T	.	C/T	T/T	C/T	C/T	C/T	T/T	.	C/T	.	T/T	C/T	.	C/T	.	.	.	.	C/T	C/T	C/T	.	.	T/T	T/T	C/T	.	C/T	.	C/T	.	C/T	C/T	.	.	C/T	C/T	.	.
oar3_OAR17_14335901	DU206327_Neighbouring SNP	OAR17	14335901	7	T	C	.	.	.	.	.	.	.	.	.	.	.	.	.	.	.	.	.	.	.	.	.	.	.	.	.	.	.	.	.	.	.	.	.	.	.	.	.	.	.	.	.	.	.
oar3_OAR17_14335956	DU206327_Neighbouring SNP	OAR17	14335956	62	T	C	.	.	.	.	.	.	.	.	.	.	.	.	.	.	.	.	.	.	.	.	.	.	.	.	.	.	.	.	.	.	.	.	.	.	.	.	.	.	.	.	.	.	.
oar3_OAR17_22259267	DU378819_Neighbouring SNP	OAR17	22259267	-55	C	G	G/G	G/G	.	C/G	G/G	.	.	G/G	G/G	G/G	G/G	G/G	G/G	G/G	G/G	G/G	G/G	G/G	G/G	G/G	.	.	.	G/G	.	G/G	G/G	G/G	G/G	G/G	G/G	G/G	G/G	G/G	G/G	G/G	G/G	G/G	G/G	G/G	G/G	G/G	G/G
DU378819	Parentage SNP	OAR17	22259322	0	T	C	C/C	T/C	.	T/C	.	.	T/C	C/C	C/C	T/C	T/C	T/C	C/C	C/C	C/C	T/C	T/C	C/C	.	.	.	.	.	T/C	.	C/C	.	T/C	T/C	T/C	.	.	.	T/C	.	.	T/C	T/C	C/C	C/C	C/C	T/C	.
oar3_OAR17_22259358	DU378819_Neighbouring SNP	OAR17	22259358	36	G	A	.	.	.	.	.	.	.	.	.	.	.	.	.	.	.	.	.	.	.	.	.	.	.	.	.	.	.	.	.	.	.	.	.	.	.	.	.	.	.	.	.	.	.
DU511222	Parentage SNP	OAR17	27375270	0	T	G	G/G	T/G	.	T/G	T/G	G/G	T/G	G/G	G/G	G/G	T/G	G/G	G/G	T/G	G/G	G/G	G/G	T/G	.	T/G	T/G	G/G	.	G/G	.	G/G	T/G	G/G	.	.	T/G	G/G	T/G	T/G	T/G	G/G	.	T/G	.	T/G	G/G	T/G	T/G
oar3_OAR17_27375318	DU511222_Neighbouring SNP	OAR17	27375318	48	G	A	.	.	.	.	.	.	.	.	G/A	.	.	.	.	.	.	.	.	.	.	.	.	.	.	.	.	.	.	.	.	.	G/A	G/A	.	.	.	.	.	G/A	.	.	.	.	.
oar3_OAR17_27375343	DU511222_Neighbouring SNP	OAR17	27375343	73	C	T	.	.	.	.	.	.	.	.	.	.	.	.	.	C/T	.	.	.	.	.	.	.	.	.	T/T	.	.	.	.	.	.	.	.	.	.	C/T	.	.	.	.	.	.	.	.
oar3_OAR17_37956417	DU300156_Neighbouring SNP	OAR17	37956417	-94	T	A	.	.	.	.	.	.	.	.	.	.	.	.	.	.	.	.	.	.	.	.	.	.	.	.	.	.	.	.	.	.	.	.	.	.	.	.	.	.	T/A	.	.	.	.
oar3_OAR17_37956465	DU300156_Neighbouring SNP	OAR17	37956465	-46	C	T	.	C/T	C/T	.	.	.	.	.	.	.	.	.	C/T	.	.	.	.	.	T/T	.	.	.	T/T	.	.	.	.	.	.	.	C/T	C/T	C/T	.	.	.	.	.	.	.	.	C/T	.
DU300156	Parentage SNP	OAR17	37956511	0	G	A	G/A	A/A	A/A	.	G/A	.	G/A	A/A	G/A	G/A	.	.	G/A	A/A	A/A	.	.	A/A	A/A	.	.	A/A	.	.	.	.	G/A	.	.	.	G/A	.	G/A	A/A	.	.	A/A	A/A	A/A	G/A	.	.	A/A
oar3_OAR17_37956547	DU300156_Neighbouring SNP	OAR17	37956547	36	C	A	.	C/A	C/A	.	.	.	.	C/A	.	.	.	.	C/A	C/A	.	.	.	.	A/A	.	.	.	A/A	.	.	.	.	.	.	.	C/A	.	C/A	.	.	.	.	.	.	.	.	.	.
oar3_OAR17_37956549	DU300156_Neighbouring SNP	OAR17	37956549	38	A	G	A/G	.	A/G	G/G	A/G	G/G	A/G	.	A/G	A/G	G/G	G/G	A/G	.	.	G/G	G/G	.	.	G/G	G/G	.	.	G/G	.	G/G	A/G	A/G	G/G	G/G	A/G	A/G	.	.	A/G	A/G	.	.	.	A/G	G/G	.	.
oar3_OAR17_37956588	DU300156_Neighbouring SNP	OAR17	37956588	77	T	C	T/C	C/C	T/C	.	T/C	.	T/C	T/C	T/C	T/C	.	.	T/C	.	C/C	.	.	C/C	C/C	.	.	C/C	.	.	.	.	T/C	T/C	.	.	T/C	T/C	T/C	C/C	C/C	.	C/C	C/C	C/C	T/C	.	.	C/C
DU463532	Parentage SNP	OAR17	55644242	0	T	C	.	.	.	C/C	T/C	C/C	.	.	.	.	T/C	T/C	T/C	T/C	T/C	C/C	T/C	.	.	T/C	.	.	C/C	T/C	.	.	T/C	T/C	T/C	C/C	.	C/C	T/C	C/C	.	T/C	.	C/C	T/C	C/C	.	.	.
oar3_OAR17_55644293	DU463532_Neighbouring SNP	OAR17	55644293	51	G	T	.	.	.	.	.	.	.	.	.	.	.	.	.	.	.	.	.	.	.	.	.	.	.	.	.	.	.	.	.	.	.	.	.	.	.	.	.	.	.	.	.	.	.
oar3_OAR17_55644313	DU463532_Neighbouring SNP	OAR17	55644313	71	G	A	G/A	A/A	A/A	.	.	.	.	A/A	G/A	A/A	G/A	G/A	G/A	.	G/A	.	G/A	G/A	.	G/A	.	G/A	.	.	.	.	G/A	.	.	.	.	.	.	.	G/A	.	G/A	.	G/A	.	.	.	.
oar3_OAR17_55644333	DU463532_Neighbouring SNP	OAR17	55644333	91	T	C	T/C	C/C	C/C	C/C	C/C	C/C	C/C	C/C	C/C	C/C	C/C	C/C	C/C	C/C	C/C	C/C	C/C	C/C	C/C	C/C	.	C/C	.	.	.	C/C	C/C	C/C	C/C	C/C	.	C/C	T/C	C/C	T/C	C/C	C/C	C/C	C/C	C/C	C/C	C/C	C/C
DU492379	Parentage SNP	OAR18	3953149	0	G	A	A/A	A/A	.	A/A	G/A	.	.	.	G/A	A/A	A/A	G/A	.	G/A	.	.	A/A	G/A	.	.	.	G/A	G/A	.	.	.	.	.	.	.	.	.	G/A	A/A	.	A/A	.	A/A	G/A	.	.	.	A/A
oar3_OAR18_3953214	DU492379_Neighbouring SNP	OAR18	3953214	65	G	A	.	.	.	.	.	.	.	.	.	.	.	.	.	.	.	.	.	.	.	.	.	.	.	.	.	.	.	.	.	.	.	.	.	.	.	.	.	.	.	.	.	.	.
oar3_OAR18_3953243	DU492379_Neighbouring SNP	OAR18	3953243	94	G	A	.	.	.	.	.	.	.	.	.	.	.	.	.	.	.	.	.	.	.	.	.	.	.	.	.	.	.	.	.	.	.	.	.	.	.	.	.	.	.	.	.	.	.
oar3_OAR18_6929163	DU438000_Neighbouring SNP	OAR18	6929163	-37	A	G	G/G	G/G	G/G	G/G	G/G	G/G	G/G	G/G	G/G	G/G	G/G	G/G	G/G	G/G	A/G	G/G	G/G	G/G	G/G	G/G	.	G/G	G/G	G/G	A/G	G/G	G/G	G/G	G/G	G/G	G/G	A/G	G/G	G/G	.	G/G	G/G	G/G	G/G	G/G	G/G	G/G	G/G
oar3_OAR18_6929168	DU438000_Neighbouring SNP	OAR18	6929168	-32	C	T	T/T	T/T	T/T	T/T	T/T	T/T	T/T	T/T	T/T	T/T	T/T	T/T	T/T	T/T	C/T	T/T	T/T	T/T	T/T	T/T	.	T/T	T/T	T/T	.	T/T	T/T	T/T	T/T	T/T	T/T	C/T	T/T	T/T	.	T/T	T/T	T/T	T/T	T/T	T/T	T/T	T/T
DU438000	Parentage SNP	OAR18	6929200	0	C	T	T/T	.	C/T	C/T	T/T	T/T	.	.	T/T	.	C/T	T/T	C/T	C/T	.	C/T	.	C/T	C/T	.	C/T	T/T	T/T	T/T	T/T	C/T	C/T	T/T	T/T	T/T	.	.	T/T	C/T	.	C/T	.	.	T/T	C/T	C/T	T/T	.
oar3_OAR18_21446547	DU488903_Neighbouring SNP	OAR18	21446547	-7	T	C	.	.	.	.	.	.	.	.	.	.	.	.	.	.	.	.	.	.	.	.	.	.	.	.	.	.	.	.	.	.	.	.	.	.	.	.	.	.	.	.	.	.	.
DU488903	Parentage SNP	OAR18	21446554	0	G	C	.	.	G/C	.	.	C/C	.	.	.	.	.	G/C	G/C	G/C	G/C	.	G/C	G/C	.	G/C	G/C	G/C	.	.	.	.	G/C	C/C	G/C	.	.	.	.	.	.	G/C	.	.	G/C	.	.	.	.
DU325612	Parentage SNP	OAR18	25519688	0	G	A	G/A	.	.	G/A	A/A	G/A	A/A	A/A	.	.	G/A	.	.	G/A	G/A	G/A	A/A	A/A	A/A	G/A	G/A	.	.	A/A	.	G/A	.	G/A	A/A	G/A	G/A	.	A/A	A/A	A/A	G/A	.	.	G/A	G/A	.	G/A	G/A
oar3_OAR18_25519735	DU325612_Neighbouring SNP	OAR18	25519735	47	C	T	.	.	.	.	.	.	.	.	.	.	.	.	.	.	.	.	.	.	.	.	.	.	T/T	.	.	.	.	.	.	.	.	.	.	.	.	.	.	.	.	.	.	.	.
oar3_OAR18_25519738	DU325612_Neighbouring SNP	OAR18	25519738	50	T	C	.	.	.	.	.	.	.	.	.	.	.	.	.	.	.	.	.	.	.	.	.	.	.	.	.	.	.	.	.	.	.	.	.	.	.	.	.	.	.	.	.	.	.
oar3_OAR18_25519754	DU325612_Neighbouring SNP	OAR18	25519754	66	C	T	.	.	.	.	.	.	.	.	.	.	.	.	.	.	.	.	.	.	.	.	.	.	.	.	.	.	.	.	C/T	.	.	.	.	.	C/T	.	.	.	C/T	C/T	.	.	.
oar3_OAR18_25519757	DU325612_Neighbouring SNP	OAR18	25519757	69	C	T	.	.	.	.	.	C/T	T/T	.	.	.	.	.	.	.	.	.	.	.	C/T	.	.	.	.	.	.	C/T	.	C/T	T/T	.	.	.	.	.	C/T	.	.	.	C/T	C/T	.	.	.
oar3_OAR18_25519767	DU325612_Neighbouring SNP	OAR18	25519767	79	A	G	.	.	.	.	.	.	.	.	.	.	.	.	.	.	.	.	.	.	.	.	.	.	G/G	.	.	.	.	.	.	.	.	.	.	.	.	.	.	.	.	.	.	.	.
oar3_OAR18_25519770	DU325612_Neighbouring SNP	OAR18	25519770	82	T	G	.	.	.	.	.	G/G	G/G	.	.	.	.	.	.	.	.	.	.	.	T/G	.	.	.	.	.	.	T/G	.	T/G	T/G	.	.	.	.	.	.	.	.	.	.	.	.	.	.
oar3_OAR18_60343209	DU440765_Neighbouring SNP	OAR18	60343209	-50	G	T	.	.	.	.	.	.	.	.	.	.	.	.	.	.	.	.	.	.	.	.	.	.	.	.	.	.	.	.	.	.	.	.	.	.	.	.	.	.	.	.	.	.	.
DU440765	Parentage SNP	OAR18	60343259	0	T	C	.	.	C/C	T/C	T/C	C/C	.	.	C/C	T/C	C/C	.	.	.	T/C	T/C	T/C	.	T/C	.	C/C	C/C	.	.	.	T/C	T/C	C/C	C/C	T/C	C/C	.	C/C	T/C	C/C	.	.	C/C	.	T/C	C/C	C/C	.
oar3_OAR18_60343277	DU440765_Neighbouring SNP	OAR18	60343277	18	G	T	.	.	T/T	.	.	.	.	.	T/T	.	G/T	.	.	.	G/T	G/T	.	.	.	.	T/T	G/T	.	.	.	G/T	.	T/T	T/T	G/T	.	.	.	.	.	.	.	.	.	G/T	.	.	.
DU345394	Parentage SNP	OAR18	60904691	0	A	C	.	.	.	.	.	.	.	.	.	.	.	.	.	.	.	.	.	.	.	.	.	.	.	.	.	.	.	.	.	.	.	.	.	.	.	.	.	.	.	.	.	.	.
oar3_OAR18_60904702	DU345394_Neighbouring SNP	OAR18	60904702	11	T	C	.	.	.	.	.	.	.	.	.	.	.	.	C/C	.	.	.	.	.	.	.	.	.	.	.	.	.	.	.	T/C	.	.	.	.	.	.	.	.	.	.	T/C	.	.	.
oar3_OAR18_60904728	DU345394_Neighbouring SNP	OAR18	60904728	37	A	G	.	.	.	.	.	.	.	.	.	.	.	.	G/G	.	.	.	A/G	.	.	.	.	.	.	.	.	.	.	.	A/G	.	.	.	.	.	.	.	.	.	.	A/G	.	.	.
oar3_OAR18_60904746	DU345394_Neighbouring SNP	OAR18	60904746	55	T	G	.	.	.	.	.	.	.	.	.	.	.	.	G/G	.	.	.	.	.	.	.	.	.	.	.	.	.	.	.	T/G	.	.	.	.	.	.	.	.	.	.	T/G	.	.	.
DU264531	Parentage SNP	OAR19	619479	0	T	G	T/G	G/G	.	G/G	T/G	T/G	.	.	.	G/G	.	.	G/G	G/G	G/G	G/G	T/G	T/G	G/G	G/G	.	.	T/G	G/G	.	.	G/G	.	G/G	G/G	T/G	.	T/G	T/G	T/G	T/G	G/G	T/G	T/G	.	T/G	.	T/G
oar3_OAR19_619568	DU264531_Neighbouring SNP	OAR19	619568	89	T	C	.	T/C	.	.	.	.	.	.	.	T/C	.	.	.	.	.	.	.	.	.	.	.	.	.	T/C	.	.	.	.	.	.	.	.	.	.	.	.	.	.	.	.	.	.	.
DU258053	Parentage SNP	OAR19	56831202	0	G	A	.	.	G/A	G/A	.	.	.	.	G/A	.	.	.	.	.	.	.	A/A	.	.	.	G/A	.	.	A/A	G/A	.	.	G/A	A/A	G/A	G/A	.	A/A	A/A	A/A	G/A	G/A	G/A	A/A	G/A	.	.	.
oar3_OAR19_56831278	DU258053_Neighbouring SNP	OAR19	56831278	76	A	G	.	.	.	.	.	.	.	.	.	.	.	.	.	.	.	.	.	.	.	.	.	.	.	.	.	.	.	.	.	.	.	.	.	.	.	.	.	.	.	.	.	.	.
DU411432	Parentage SNP	OAR19	56956148	0	T	G	.	.	T/G	T/G	T/G	T/G	.	.	T/G	T/G	G/G	T/G	.	T/G	T/G	.	T/G	T/G	.	G/G	G/G	.	.	.	.	T/G	.	.	T/G	T/G	T/G	T/G	T/G	T/G	T/G	.	T/G	T/G	G/G	G/G	T/G	.	T/G
oar3_OAR19_56956205	DU411432_Neighbouring SNP	OAR19	56956205	57	C	T	.	.	C/T	.	.	.	.	.	C/T	C/T	.	.	.	.	.	.	.	.	.	.	.	.	.	C/T	C/T	.	.	.	C/T	C/T	.	.	.	.	.	.	.	C/T	.	.	.	.	.
oar3_OAR19_56956226	DU411432_Neighbouring SNP	OAR19	56956226	78	G	A	.	.	.	.	.	.	.	.	.	.	.	.	.	.	.	.	.	.	.	.	.	.	.	.	.	.	.	.	.	.	.	.	.	.	.	.	.	.	.	.	.	.	.
oar3_OAR20_31388922	DU183112_Neighbouring SNP	OAR20	31388922	-28	G	T	T/T	G/T	T/T	.	G/T	G/T	G/T	T/T	G/T	T/T	.	T/T	T/T	G/T	G/T	T/T	G/T	.	G/T	T/T	.	.	G/T	G/T	T/T	T/T	G/T	T/T	T/T	G/T	T/T	T/T	G/T	T/T	G/T	G/T	.	T/T	G/T	G/T	T/T	G/T	G/T
DU183112	Parentage SNP	OAR20	31388950	0	C	T	T/T	C/T	T/T	.	C/T	C/T	C/T	T/T	C/T	T/T	C/T	T/T	T/T	C/T	C/T	.	C/T	.	C/T	T/T	.	.	C/T	C/T	T/T	T/T	C/T	T/T	C/T	.	T/T	T/T	C/T	T/T	C/T	C/T	.	T/T	C/T	C/T	T/T	.	C/T
oar3_OAR20_31389001	DU183112_Neighbouring SNP	OAR20	31389001	51	C	T	.	.	.	.	.	.	.	.	.	.	.	.	.	.	.	.	.	.	.	.	.	.	.	.	.	.	.	.	.	.	.	.	.	.	.	.	.	.	.	.	.	.	.
oar3_OAR20_31389008	DU183112_Neighbouring SNP	OAR20	31389008	58	C	G	G/G	C/G	G/G	.	C/G	C/G	C/G	G/G	C/G	G/G	C/G	G/G	G/G	C/G	C/G	G/G	C/G	.	C/G	G/G	.	C/G	C/G	C/G	G/G	G/G	C/G	G/G	C/G	.	G/G	.	C/G	G/G	C/G	C/G	C/G	G/G	C/G	.	G/G	G/G	.
oar3_OAR20_31389028	DU183112_Neighbouring SNP	OAR20	31389028	78	C	A	A/A	C/A	A/A	.	C/A	C/A	.	A/A	C/A	A/A	C/A	A/A	A/A	C/A	C/A	A/A	C/A	C/A	C/A	A/A	.	C/A	C/A	C/A	A/A	A/A	C/A	A/A	C/A	C/A	A/A	A/A	C/A	A/A	C/A	C/A	.	A/A	C/A	C/A	A/A	C/A	.
oar3_OAR20_48673711	DU442373_Neighbouring SNP	OAR20	48673711	-28	T	G	.	.	.	.	.	.	.	.	.	.	.	.	.	.	.	.	.	.	.	.	.	.	.	.	.	.	.	.	.	.	.	.	.	.	.	.	.	.	.	.	.	.	.
oar3_OAR20_48673728	DU442373_Neighbouring SNP	OAR20	48673728	-11	A	C	.	.	.	.	.	.	.	.	.	.	.	.	.	.	.	.	.	.	.	.	.	.	.	.	.	.	.	.	.	.	.	.	.	.	.	.	.	.	.	.	.	.	.
DU442373	Parentage SNP	OAR20	48673739	0	T	C	T/C	T/C	T/C	.	C/C	C/C	C/C	.	T/C	C/C	C/C	T/C	C/C	C/C	C/C	C/C	C/C	.	.	C/C	C/C	C/C	C/C	C/C	.	T/C	C/C	C/C	C/C	T/C	.	T/C	C/C	T/C	C/C	T/C	C/C	T/C	T/C	C/C	T/C	.	C/C
oar3_OAR20_48673747	DU442373_Neighbouring SNP	OAR20	48673747	8	T	C	.	.	.	.	.	.	.	.	.	.	.	.	.	.	.	.	.	.	.	.	.	.	.	.	.	.	.	.	.	.	.	.	.	.	.	.	.	.	.	.	.	.	.
oar3_OAR20_48673752	DU442373_Neighbouring SNP	OAR20	48673752	13	C	T	.	.	.	.	.	.	.	.	.	.	.	.	.	.	.	.	.	.	.	.	.	.	.	.	.	.	.	.	.	.	.	.	.	.	.	.	.	.	.	.	.	.	.
oar3_OAR20_48673832	DU442373_Neighbouring SNP	OAR20	48673832	93	C	A	.	.	.	.	.	.	.	.	.	.	.	.	.	.	.	.	.	.	.	.	.	.	.	.	.	.	.	.	.	.	.	.	.	.	.	.	.	.	.	.	.	.	.
oar3_OAR21_28222507	DU380983_Neighbouring SNP	OAR21	28222507	-60	C	T	.	.	.	.	.	.	.	.	.	.	.	.	.	.	.	.	.	.	.	.	.	.	.	.	.	.	.	.	.	.	.	.	.	.	.	.	.	.	.	.	.	.	.
DU380983	Parentage SNP	OAR21	28222567	0	A	G	.	G/G	A/G	.	G/G	.	A/G	A/G	G/G	A/G	G/G	A/G	.	.	A/G	G/G	A/G	.	A/G	.	.	G/G	.	A/G	A/G	.	G/G	.	.	A/G	A/G	.	.	A/G	.	A/G	.	.	G/G	.	A/G	A/G	.
oar3_OAR21_39815616	DU383863_Neighbouring SNP	OAR21	39815616	-43	C	T	.	.	.	.	.	.	.	.	.	.	.	.	.	.	.	.	.	.	.	.	.	.	.	.	.	.	.	.	.	.	.	.	.	.	.	.	.	.	.	.	.	.	.
DU383863	Parentage SNP	OAR21	39815659	0	A	G	A/G	G/G	A/G	A/G	.	A/G	A/G	A/G	G/G	A/G	A/G	A/G	G/G	G/G	A/G	.	.	A/G	.	A/G	.	A/G	G/G	G/G	.	A/G	.	G/G	.	.	.	.	G/G	A/G	.	.	.	.	.	A/G	A/G	G/G	.
oar3_OAR21_39815720	DU383863_Neighbouring SNP	OAR21	39815720	61	C	T	C/T	T/T	.	.	.	.	.	C/T	.	.	.	.	.	.	.	.	.	.	.	.	.	.	.	.	.	C/T	.	.	.	.	.	.	C/T	.	.	.	.	.	.	.	C/T	.	.
oar3_OAR21_39815731	DU383863_Neighbouring SNP	OAR21	39815731	72	C	T	.	.	.	.	.	.	.	.	.	.	.	C/T	C/T	.	.	.	.	C/T	.	.	.	.	.	.	.	.	.	.	.	.	.	.	.	.	.	.	.	.	.	.	.	.	.
DU196132	Parentage SNP	OAR21	44206475	0	G	A	.	G/A	A/A	G/A	A/A	A/A	A/A	G/A	.	A/A	A/A	A/A	A/A	A/A	G/A	.	A/A	A/A	A/A	A/A	A/A	G/A	A/A	A/A	A/A	A/A	G/A	A/A	A/A	A/A	.	.	G/A	G/A	.	A/A	.	G/A	A/A	A/A	A/A	A/A	.
oar3_OAR21_44206560	DU196132_Neighbouring SNP	OAR21	44206560	85	A	G	.	A/G	G/G	A/G	G/G	A/G	G/G	.	.	G/G	G/G	G/G	G/G	G/G	A/G	A/G	G/G	A/G	G/G	G/G	G/G	A/G	G/G	G/G	.	G/G	A/G	G/G	G/G	G/G	G/G	.	A/G	A/G	.	G/G	A/G	A/G	G/G	G/G	G/G	G/G	.
DU413316	Parentage SNP	OAR22	13089948	0	C	T	T/T	C/T	.	.	C/T	.	C/T	C/T	.	.	C/T	T/T	.	T/T	.	T/T	T/T	T/T	T/T	.	.	.	.	C/T	.	.	C/T	C/T	T/T	C/T	.	T/T	.	.	C/T	T/T	.	.	C/T	.	C/T	.	C/T
oar3_OAR22_13090047	DU413316_Neighbouring SNP	OAR22	13090047	99	C	T	.	.	.	.	.	.	.	.	.	.	.	.	.	.	.	.	.	.	.	.	.	.	.	.	.	.	.	.	.	.	.	.	.	.	.	.	.	.	.	.	.	.	.
DU302760	Parentage SNP	OAR23	11553748	0	T	C	.	.	.	T/C	T/C	T/C	T/C	T/C	T/C	T/C	C/C	.	.	T/C	C/C	C/C	T/C	C/C	.	C/C	C/C	C/C	.	.	.	.	T/C	C/C	.	T/C	C/C	T/C	.	C/C	C/C	C/C	.	.	C/C	T/C	.	.	C/C
oar3_OAR23_11553809	DU302760_Neighbouring SNP	OAR23	11553809	61	G	A	A/A	A/A	.	G/A	.	A/A	A/A	A/A	A/A	G/A	G/A	A/A	A/A	A/A	.	.	A/A	.	A/A	A/A	A/A	G/A	A/A	A/A	.	.	G/A	A/A	A/A	G/A	G/A	G/A	A/A	A/A	G/A	.	A/A	A/A	A/A	A/A	A/A	G/A	G/A
oar3_OAR23_17168318	DU313102_Neighbouring SNP	OAR23	17168318	-53	G	A	.	A/A	.	.	.	.	.	.	.	.	.	.	.	.	.	.	.	.	.	G/A	.	.	.	.	.	G/A	.	.	.	.	.	.	.	.	.	.	.	.	.	.	.	.	.
oar3_OAR23_17168325	DU313102_Neighbouring SNP	OAR23	17168325	-46	C	A	.	.	.	.	.	.	.	.	.	.	.	.	.	.	.	.	.	.	.	.	.	.	.	.	.	.	.	.	.	.	.	.	.	.	.	.	.	.	.	.	.	.	.
oar3_OAR23_17168334	DU313102_Neighbouring SNP	OAR23	17168334	-37	C	T	.	.	.	.	.	.	.	.	.	.	.	.	.	.	.	.	.	.	.	.	.	.	.	.	.	.	.	.	.	.	.	.	.	.	.	.	.	.	.	.	.	.	.
DU313102	Parentage SNP	OAR23	17168371	0	C	T	T/T	T/T	C/T	C/T	T/T	T/T	C/T	T/T	.	T/T	.	T/T	C/T	T/T	C/T	C/T	.	C/T	T/T	C/T	.	.	T/T	C/T	.	T/T	C/T	.	T/T	T/T	C/T	C/T	.	C/T	.	C/T	.	.	T/T	T/T	T/T	T/T	T/T
oar3_OAR23_17168429	DU313102_Neighbouring SNP	OAR23	17168429	58	C	T	.	.	.	.	.	.	C/T	.	.	.	.	.	C/T	.	.	C/T	.	C/T	.	C/T	T/T	T/T	.	C/T	.	.	C/T	.	.	.	.	.	C/T	C/T	.	.	C/T	T/T	.	.	.	.	.
oar3_OAR24_3289160	CZ920359_Neighbouring SNP	OAR24	3289160	-99	G	A	.	.	.	.	.	.	.	A/A	.	G/A	.	.	.	.	G/A	A/A	G/A	G/A	.	G/A	.	G/A	.	.	.	.	G/A	.	A/A	.	.	.	.	.	.	.	.	.	.	.	.	.	.
oar3_OAR24_3289185	CZ920359_Neighbouring SNP	OAR24	3289185	-74	G	A	A/A	.	.	.	.	.	.	.	.	.	.	A/A	G/A	A/A	.	.	G/A	G/A	G/A	.	G/A	G/A	A/A	.	.	.	G/A	G/A	.	.	.	A/A	.	.	.	.	.	G/A	G/A	A/A	G/A	.	.
CZ920359	Parentage SNP	OAR24	3289259	0	G	A	G/A	.	.	G/A	A/A	G/A	A/A	A/A	G/A	G/A	A/A	.	.	G/A	.	A/A	G/A	.	.	A/A	.	.	.	A/A	.	A/A	G/A	.	.	.	.	.	.	A/A	.	A/A	A/A	A/A	G/A	.	G/A	.	A/A
oar3_OAR25_96790	DU455254_Neighbouring SNP	OAR25	96790	-74	C	A	.	.	.	C/A	.	.	.	C/A	.	.	A/A	.	.	.	.	.	.	C/A	.	C/A	.	.	.	.	.	C/A	.	.	.	.	.	.	A/A	.	.	.	.	.	.	C/A	.	.	C/A
DU455254	Parentage SNP	OAR25	96864	0	G	A	.	.	.	A/A	.	.	G/A	A/A	.	G/A	A/A	.	G/A	.	G/A	.	G/A	A/A	.	G/A	G/A	.	.	.	A/A	G/A	.	.	.	.	.	A/A	A/A	G/A	.	.	.	A/A	.	G/A	.	G/A	.
DU512685	Parentage SNP	OAR25	1257182	0	T	C	C/C	T/C	C/C	.	C/C	C/C	T/C	C/C	T/C	C/C	T/C	.	.	T/C	.	.	T/C	T/C	.	.	.	C/C	.	.	T/C	C/C	T/C	.	C/C	.	C/C	C/C	T/C	T/C	.	.	.	T/C	.	T/C	T/C	.	T/C
oar3_OAR25_1257266	DU512685_Neighbouring SNP	OAR25	1257266	84	A	C	C/C	A/C	A/C	.	A/C	.	.	.	.	A/C	A/C	.	.	A/C	.	.	.	.	.	.	.	A/C	.	.	.	.	.	.	.	.	A/C	A/C	A/C	A/C	.	.	.	.	.	.	.	.	.
oar3_OAR25_1257273	DU512685_Neighbouring SNP	OAR25	1257273	91	A	G	G/G	A/G	G/G	.	G/G	G/G	A/G	G/G	A/G	G/G	A/G	.	.	A/G	.	.	A/G	.	.	.	.	G/G	.	.	.	G/G	A/G	.	G/G	.	G/G	G/G	A/G	A/G	.	.	.	A/G	.	A/G	.	.	A/G
oar3_OAR25_21525208	DU405213_Neighbouring SNP	OAR25	21525208	-47	A	G	A/G	.	.	.	G/G	G/G	G/G	.	.	A/G	.	G/G	.	G/G	A/G	.	A/G	G/G	G/G	.	.	G/G	G/G	A/G	.	.	A/G	G/G	.	A/G	G/G	A/G	A/G	.	.	A/G	G/G	.	A/G	G/G	A/G	.	A/G
DU405213	Parentage SNP	OAR25	21525255	0	T	C	T/C	.	.	.	C/C	C/C	C/C	.	T/C	T/C	.	C/C	T/C	C/C	T/C	.	.	C/C	C/C	.	.	C/C	C/C	T/C	.	.	T/C	C/C	.	T/C	C/C	T/C	T/C	C/C	.	T/C	C/C	.	T/C	C/C	T/C	.	T/C
oar3_OAR25_21525270	DU405213_Neighbouring SNP	OAR25	21525270	15	G	T	G/T	.	.	.	.	.	G/T	.	.	.	.	.	.	G/T	G/T	.	.	G/T	.	.	G/T	.	.	.	.	.	.	G/T	.	G/T	.	.	.	.	.	.	T/T	.	.	.	G/T	.	.
oar3_OAR25_21525305	DU405213_Neighbouring SNP	OAR25	21525305	50	T	C	T/C	.	.	.	C/C	C/C	C/C	.	T/C	T/C	.	C/C	T/C	C/C	T/C	.	.	C/C	C/C	T/C	T/C	.	C/C	T/C	.	.	T/C	C/C	.	.	C/C	T/C	T/C	C/C	.	T/C	C/C	.	T/C	C/C	T/C	.	T/C
oar3_OAR25_21525317	DU405213_Neighbouring SNP	OAR25	21525317	62	T	C	.	.	.	.	.	T/C	T/C	.	T/C	T/C	.	C/C	T/C	.	.	.	.	T/C	C/C	T/C	.	.	C/C	.	.	T/C	T/C	.	.	.	C/C	T/C	T/C	C/C	.	T/C	.	.	T/C	C/C	.	.	T/C
oar3_OAR25_21525321	DU405213_Neighbouring SNP	OAR25	21525321	66	T	C	.	.	.	.	.	.	.	.	.	.	.	.	.	.	.	.	.	.	.	.	.	.	.	.	.	.	.	.	.	.	.	.	.	.	.	.	.	.	.	.	.	.	.
oar3_OAR25_21525342	DU405213_Neighbouring SNP	OAR25	21525342	87	C	G	.	.	.	.	G/G	G/G	G/G	.	C/G	C/G	.	G/G	.	G/G	C/G	.	.	G/G	G/G	C/G	C/G	G/G	G/G	C/G	.	C/G	C/G	G/G	.	C/G	G/G	C/G	C/G	G/G	.	C/G	G/G	.	C/G	G/G	C/G	.	.
[truncated: 30 more columns]

## Sheet: Sheet2
				DU260081_579
